## **Transcytosis maintains CFTR apical polarity in the face of constitutive and mutation-induced basolateral missorting**

Aurélien Bidaud-Meynard<sup>1#</sup>, Florian Bossard<sup>1</sup>, Andrea Schnúr<sup>1</sup>, Ryosuke Fukuda<sup>1</sup>, Guido Veit<sup>1</sup>,  
Haijin Xu<sup>1</sup> and Gergely L. Lukacs<sup>1,2\*</sup>

<sup>1</sup>Department of Physiology, <sup>2</sup>Department of Biochemistry, McGill University, Montréal, QC, H3G 1Y6, Canada

# Present address : Univ Rennes, CNRS, IGDR - UMR 6290, F-35000 Rennes, France

\* Correspondance: [gergely.lukacs@mcgill.ca](mailto:gergely.lukacs@mcgill.ca) (G.L.L.)

## SUMMARY

Apical polarity of cystic fibrosis transmembrane conductance regulator (CFTR) is essential for solute and water transport in secretory epithelia and can be impaired in human diseases. Maintenance of apical polarity in the face of CFTR non-polarized delivery and compromised apical retention of mutant CFTRs lacking PDZ-domain protein (NHERF1) interaction, remains enigmatic. Here we show that basolateral CFTR delivery originates from biosynthetic (~35%) and endocytic (~65%) recycling missorting. Basolateral channels are retrieved via basolateral-to-apical transcytosis, enhancing CFTR apical expression by two-fold and suppressing its degradation. CFTR transcytosis is microtubule-dependent but independent of Myo5B-, Rab11- and NHERF1 binding to its C-terminal DTRL motif in airway epithelia. Increased basolateral delivery due to compromised apical recycling and accelerated internalization upon impaired NHERF1-CFTR association is largely counterbalanced by CFTR efficient basolateral internalization and apical transcytosis. Thus, transcytosis represents a previously unrecognized but indispensable mechanism for maintaining CFTR apical polarity by attenuating its constitutive and mutation-induced basolateral missorting.

## INTRODUCTION

The anion selective channel CFTR, a member (ABCC7) of the ABC transporter superfamily, is predominantly expressed at the apical plasma membrane (PM) of secretory and resorptive epithelia (Riordan, 2008). CFTR maintains the ionic, composition and volume homeostasis of the airway surface liquid, prerequisites for the physiological regulation of mucocilliary clearance and innate immune response of airway epithelia, and to prevent uncontrolled infection and inflammation of the lung, the primary causes of morbidity and mortality in cystic fibrosis (CF) (Cutting, 2015; Rowe et al., 2005). Inherited functional expression defect of CFTR at the apical PM of epithelia causes CF, while acquired loss of CFTR expression in airway epithelia and pancreatic duct is associated with chronic obstructive pulmonary disease (COPD), asthma and pancreatitis, respectively (Schnur et al., 2016).

Four vesicular transport routes determine CFTR steady-state expression at the PM: biosynthetic secretion, slow constitutive internalization and recycling, as well as endo-lysosomal/autophagosomal degradation (Ameen et al., 2007; Fu and Sztul, 2009; Gentzsch et al., 2004; Sharma et al., 2004). Given the long cellular and PM half-life of CFTR (Okiyoneda et al., 2018; Varga et al., 2008), slow internalization rate with high fidelity of apical recycling is essential to maintain Cl<sup>-</sup> transport capacity by minimizing the channel premature degradation and basolateral missorting.

In polarized epithelia, apical and basolateral PM proteins partition between apical sorting (ASE), apical recycling (ARE), basolateral sorting (BSE), and common recycling (CRE) endosomes, respectively (Stoops and Caplan, 2014). Previous studies have shown that apically internalized CFTR is confined to EEA1<sup>+</sup> ASE and recycles via Rab11<sup>+</sup> ARE in airway cells (Cholon et al., 2009; Swiatecka-Urban et al., 2007), in a PKA-dependent manner (Holleran et al., 2013), but the molecular basis of rapid degradation of basolaterally delivered and natively folded CFTR is not known.

Nevertheless, forced missorting of CFTR to the basolateral PM suppressed the transepithelial anion secretion efficiency (Farmen et al., 2005).

Apical confinement of PM proteins can be achieved either by direct apical targeting from the *trans*-Golgi network (TGN) (Takeda et al., 2003), indirectly by transcytosis from the basolateral PM (Anderson et al., 2005) or by non-polarized delivery with selective retention at the apical PM and rapid degradation from the basolateral PM, as described for CFTR (Swiatecka-Urban et al., 2002). The association of PDZ (Postsynaptic density/Disc large/ZO-1) domain adaptor proteins with PM proteins exposing a PDZ binding motif can serve as polarized targeting and/or retention signal at both the apical and basolateral PM (Brone and Eggermont, 2005). NHERF1/2 binding to CFTR C-terminal PDZ binding motif (DTRL<sup>1480</sup>) has been implicated in the channel apical targeting, retention, confined lateral diffusion and endocytic recycling (Haggie et al., 2004; Moyer et al., 1999; Swiatecka-Urban et al., 2002) by tethering it via ezrin to the subapical actin network (Short et al., 1998; Sun et al., 2000). Deletion of the DTRL motif caused by the S1455X premature termination codon, however, manifested in the isolated elevation of sweat Cl<sup>-</sup> concentration in the absence of lung and pancreatic phenotype in the background of an in frame deletion of exon 14a, which encodes a non-functional CFTR (Mickle et al., 1998). These observations with extensive mutagenesis studies (Benharouga et al., 2003; Milewski et al., 2005; Milewski et al., 2001; Ostedgaard et al., 2003) suggested that CFTR tethering to the subapical cytoskeleton via NHERF is not essential for the channel apical polarity. To identify additional mechanism(s) that preserve CFTR polarity in the absence of NHERF tethering function, we investigated the candidate trafficking pathways, sorting signals, and molecular players that may be involved in CFTR polarity development.

Here we show that basolateral-to-apical (or apical) transcytosis is indispensable to maintain CFTR apical polarity and metabolic stability in the face of limited fidelity of the channel apical

biosynthetic secretion and recycling from apical endosomes, which both induce its basolateral missorting. The microtubule-dependent, but Myo5B-independent CFTR transcytosis in airway cells avoids both apical and basolateral endocytic recycling compartments but traverses EEA1<sup>+</sup> sorting endosomes. Furthermore, apical transcytosis counteracts the augmented basolateral missorting of C-terminal truncated CFTR, providing a plausible explanation for the isolated resorbtive defect in the sweat gland of individuals harboring S1445X-CFTR.

## RESULTS

### Human airway epithelial models for studying CFTR polarized sorting

To investigate polarized trafficking, CFTR containing a 3HA-tag in its 4<sup>th</sup> extracellular loop was expressed in CF bronchial epithelial cells (CFBE41o<sup>-</sup> or CFBE) under the control of the tetracycline transactivator (Ehrhardt et al., 2006; Veit et al., 2012). Filter-grown CFBE cells were cultured for 3-5 days post-confluence and CFTR expression was induced with doxycycline (+dox) to reach similar or lower expression to that in Calu-3 cells, a lung adenocarcinoma epithelia cell line endogenously expressing CFTR (Figure 1A). The mass difference between the endogenous and tagged CFTR can be attributed to 3HA-tag and altered complex-glycosylation, demonstrated by the mobility shift observed after glycosidase digestion (Figure S1A), but had no significant impact on the channel folding, trafficking, stability and function (Peters et al., 2011). As a second model, CFTR-3HA was expressed in conditionally reprogrammed human primary bronchial epithelial cells (CR-HBE) differentiated under air-liquid interface for  $\geq 4$  weeks after lentiviral transduction (Figure 1B). Hallmarks of airway epithelia differentiation were documented: tight-junctional localization of ZO-1, mucin 5 accumulation in goblet cells, accumulation of acetylated tubulin in cilia, as well as development of transepithelial electrical resistance ( $>500 \Omega/\text{cm}^2$ ), airway surface liquid (ASL,  $\sim 10\mu\text{m}$ ), and polarized  $\text{H}^+/\text{K}^+$  ATPase and transferrin receptor (TfR) expression (Figures 1C, S1B-D and Methods). Apical localization and function of exogenously expressed CFTR-3HA was demonstrated by immunostaining and the presence of dox-inducible and CFTR inhibitor (Inh<sub>172</sub>)-sensitive PKA-activated short circuit current (Isc) (Figures 1D-E and 6I).

### CFTR is constitutively transcytosed in human airway epithelia

Newly synthesized CFTR is targeted randomly to both apical and basolateral PM in MDCK cells (Swiatecka-Urban et al., 2002). To study CFTR biosynthetic targeting in CFBE, we determined the

kinetics of domain-specific appearance of a cohort of newly translated CFTR, containing an HRP-tag in its 4<sup>th</sup> extracellular loop (Veit et al., 2014). HRP activity, as a surrogate measure of CFTR PM appearance, was monitored after dox-induction of CFTR-HRP transcription in CFBE and MDCK cells. CFTR-HRP activity appeared simultaneously at the apical and basolateral PM (236 min vs 242 min in CFBE; 164 min vs 156 min in MDCK, Figure S1E-G), confirming the non-polarized biosynthetic secretion of CFTR in both epithelia (Swiatecka-Urban et al., 2002). Considering that basolateral sorting of CFTR takes place at the TGN, we hypothesized that natively folded channels are targeted for apical transcytosis instead of lysosomal degradation.

To assess apical transcytosis, we monitored the postendocytic fate of basolateral CFTR-3HA after labeling the channel with anti-HA antibody (Ab) capture from the basolateral compartment of filter-grown CFBE and CR-HBE at 37°C for 3h. CFTR-anti-HA Ab complexes were accumulated at the apical PM as well as intracellularly (Figure 2A, *left panel*), visualized by A488-conjugated secondary Ab and laser confocal fluorescence microscopy (LCFM). Following 2h chase, the intracellular CFTR staining was diminished (Figure 2A, *middle panel*). No staining was detected in the absence CFTR (Figure S1H), indicating that the primary Ab staining cannot be attributed to non-specific binding or CFTR-independent Ab transcytosis. We used similar assays to confirm CFTR transcytosis by electron microscopy (EM) with post-embedding secondary Ab decorated nanogold labeling. Anti-HA-CFTR complex accumulation at the apical or basolateral PM was detected following anti-HA labeling from contralateral compartments only in CFTR expressing CFBE (+dox, 3h, 37°C) (Figures 2B-C and S2A), suggesting that CFTR undergoes bidirectional transcytosis.

### **Determination of CFTR apical transcytotic flux**

To estimate the CFTR transcytotic flux, we labeled basolateral channels by anti-HA Ab capture and detected the transcytosed CFTR-Ab complexes by PM-ELISA at the apical PM (Figure S2B,

*right*). The amount of transcytosed CFTR amount was expressed as the percentage of the steady-state apical CFTR PM density (Figure S2B, *left*). CFTR accumulation at the apical PM was a function of basolateral Ab-labeling time (0.5-3h) at 37°C (Figure 2D). After 3h of Ab capture, 32 ±3% and 14 ±3% of the apical PM pool was labeled by transcytosis in CFBE and CR-HBE, respectively (Figure 2E). These values, due to constitutive internalization of transcytosed CFTR-anti-HA Ab complexes, are likely underestimated. The channel transcytosis remained unaltered after reducing the dox-induction of CFTR expression to that of ~25% in Calu-3 cells (Figure S2C).

Several evidences indicate the specificity of the ELISA-based transcytosis assay. 1) Transepithelial or paracellular Ab transport was ruled out by the lack of HRP-conjugated Ab translocation from the basolateral into the apical compartment at 37°C (Figure S2D-E). 2) Neither non-specific mouse or rabbit Ab was apically transcytosed, indicating that FcRn- or pIgR-mediated Ab transport cannot contribute to the transcytotic signal (Figure S2F). Likewise, the contribution of fluid phase transcytosis of anti-HA Ab was negligible (Figure S2F, Ap HA vs Ap + BI HA). 3) CFTR transcytosis was completely abolished on ice or in the absence of CFTR expression (Figure 2F). 4) We confirmed that endogenously expressed TfR and EGF-receptor (EGFR) are also missorted by apical transcytosis in CFBE (Figure 2E) despite their highly polarized basolateral PM expression. Jointly, these results suggest that CFTR belongs to a handful of PM proteins (e.g. TfR, aquaporin 2 (AQP2) and the Cu-ATPase) whose polarized missorting is compensated by transcytosis.

### **Contribution of biosynthetic and endocytic missorting to CFTR basolateral delivery**

Basolateral delivery of newly synthesized CFTR may originate from the endoplasmic reticulum by non-conventional trafficking (Gee et al., 2011; Yoo et al., 2002), the TGN (Swiatecka-Urban et al., 2002) and/or from the apical PM via basolateral (apical-to-basolateral) transcytosis. To evaluate the



biosynthetic pathway contribution to CFTR basolateral delivery, apical transcytosis was measured following termination of CFTR transcription/translation. After 24h dox washout (dox-OFF), CFTR translation was completely abrogated, confirmed by metabolic pulse-labelling (Figure 3A). Biosynthetic arrest decreased CFTR apical transcytosis by  $33.6 \pm 4.8\%$  in CFBE. CFTR apical transcytosis was similarly reduced (40-50%) in polarized kidney (MDCK, LLC-PK1) and airway (H441) epithelia (Figure 3B).

Under steady-state condition, we detected only a small fraction of the total CFTR-HRP ( $2.4 \pm 0.6\%$ ) or CFTR-3HA ( $3.3 \pm 0.4\%$ ) expression at the basolateral PM by HRP activity and PM ELISA, respectively (Figure S3A). The modest steady-state basolateral density of CFTR can be attributed to the concerted result of the surprisingly rapid basolateral ( $41.8 \pm 7.3\%/5\text{min}$ ) and the  $>5$ -fold slower apical ( $8.0 \pm 1.0\%/5\text{ min}$ ) internalization rate, in concert with efficient apical endocytic recycling ( $35.8 \pm 2.2\%/10\text{min}$ ) of CFTR (Figure 3C). These processes are complemented by CFTR constitutive apical transcytosis to preserve the channel polarity, substantiated by the observation that at least 75% of the apical CFTR pool could be labeled by transcytosing CFTR-anti-HA Ab from the basolateral compartment after 12h (Figure 3D).

Given that the biosynthetic secretion supplies  $\sim 35\%$  of apically transcytosed CFTR, apical-to-basolateral transcytosis accounts for  $\sim 65\%$  of basolaterally delivered channels in CFBE (Figure 3B). To visualize CFTR apical-to-basolateral transcytosis, the channel was apically labeled by anti-HA Ab capture (3h,  $37^\circ\text{C}$ ), followed by immuno-EM. Apically endocytosed CFTR-Ab complex was detectable at the basolateral PM (Figure 3E-F).

If CFTR is basolaterally missorted from apical endosomes, the round-trip transcytosis of apically labeled CFTR should be observed. To this end, we simultaneously exposed CFTR expressing CFBE to apical anti-HA Ab and basolateral HRP-conjugated secondary Fab at  $37^\circ\text{C}$ . We monitored the

time-dependent appearance of the HRP activity at the apical PM (Figure 3G). The results confirmed that apical CFTR-anti-HA Ab complexes successively underwent apical-to-basolateral targeting, association with HRP-Fab, and then basolateral-to-apical transcytosis.

Jointly, these results suggest that constitutive apical transcytosis preserves CFTR apical polarity, which would be compromised in the absence of transcytosis. To test this conjecture, we inhibited cargo delivery to and retrieval from the basolateral PM by tannic acid (TA) crosslinking (Polishchuk et al., 2004). Basolateral TA exposure (15min, 37°C) accelerated the loss of apical CFTR to  $11.3 \pm 1.2\%/h$  compared to control ( $\sim 5.5\%/h$ ) in dox-OFF CFBE (Figure 3H). This translates a reduction of CFTR half-life from  $\sim 12.4h$  to  $\sim 5.8h$ , assuming an exponential decay kinetic, in the absence of apical transcytosis and underscores the significance of transcytosis in CFTR apical PM stability.

### **CFTR transcytotic route in airway epithelia**

To delineate the transcytotic route of CFTR in CFBE, the channel was basolaterally labeled with anti-HA Ab (45min, 37°C), while HA detection at the cell surface was prevented with anti-mouse Fab. CFTR was then colocalized with organelle markers of ASE (EEA1), ARE (Rab11), CRE (Rab8), CRE and BSE (Transferrin, Tf), and fast recycling endosomes (Rab4) by indirect immunostaining. Transcytosed CFTR progressively accumulated in EEA1<sup>+</sup> ASE and negligibly with Rab11<sup>+</sup> ARE en route to the apical PM but failed to colocalize with Rab4 (Figures 4A, B and S3B). While no CFTR was colocalized with the CRE marker Rab8, we observed a modest but significant colocalization ( $\sim 32\%$ ) with Cy3-Tf, especially in basal and middle sections of epithelia, while only  $\sim 19\%$  of the TfR pool was colocalized with transcytosed CFTR throughout the cell (Figures 4A-B and S3C-D).

To verify functionally whether transcytotic CFTR traverses TfR-containing endocytic compartments, basolateral endosomes were loaded with HRP-Tf (30min) to target the CRE (and to a

much lesser extent the BSE) and these compartments were ablated using HRP-mediated cross-linking (Cresawn et al., 2007; Henry and Sheff, 2008). This protocol efficiently abrogated basolateral recycling and apical transcytosis of TfR but failed to alter CFTR transcytosis (Figure 4C-D). In contrast, ablation of BSE with HRP-WGA profoundly decreased CFTR transcytosis (Figure 4D). Overall, these results indicate that basolaterally internalized CFTR accumulates in EEA1<sup>+</sup> ASE but seems to segregate from TfR<sup>+</sup> CRE and Rab11<sup>+</sup> ARE for apical transcytosis.

### **Missorting of internalized CFTR for basolateral transcytosis**

To confirm CFTR transcytotic itinerary in CFBE cells and assess the origin of CFTR loaded apical-to-basolateral transcytotic vesicles, we knocked down putative or proven regulators of CFTR endocytic traffic by siRNA (Figure S4A-B). Although ablation of Rab5 and Rab11 affected CFTR recycling (Gentsch et al., 2004) (Figure 5A, top), they failed to influence CFTR transcytosis (Figure 5B). Similar results were observed after ablation of SNX4, a Rab11 interacting protein, ACAP1, a coat protein associated with recycling endosomes, as well as SNX17 which have been implicated in E-cadherin, Glut4 and integrin but not in CFTR recycling (Li et al., 2007; Solis et al., 2013; Steinberg et al., 2012) (Figure 5A-B). CFTR transcytosis remained also unaltered upon Rab4 and Rab8 depletion, confirming our immunostaining results (Figures 4A and 5B). Rab5 and ACAP1 siRNA ablation significantly, while SNX4 siRNA marginally decreased CFTR apical density, consistent with their permissive role in CFTR recycling (Figure 5A). These results suggest that basolateral missorting of internalized CFTR occurs before its Rab5-dependent entry into the ASE and confirm that CFTR apical transcytosis is independent of Rab8<sup>+</sup> CRE and Rab11<sup>+</sup> ARE in CFBE, in contrast to other transcytosed cargoes (e.g. pIgR), which transit the CRE and ARE prior to exocytosis (Jerdeva et al., 2010).

Only Syntaxin 3 (STX3) knockdown decreased CFTR apical transcytosis significantly (Figure 5B and S4A-B). Depletion or mutation of the apical targeting signal of this t-SNARE enhances basolateral mistargeting of NHE3 and p75-GFP (Sharma et al., 2006; Vogel et al., 2015). Interestingly, a fraction of STX3 was localized at the basolateral PM and its retrieval through an ubiquitin-dependent mechanism facilitated the recruitment of cargoes into apical exosomes (Giovannone et al., 2017). Considering that biosynthesis arrest abrogated the effect of STX3 siRNA on CFTR transcytosis (Figure 5C, dox-OFF), we suggest that STX3, besides controlling CFTR apical exocytosis (Collaco et al., 2010) may be involved in the delivery and/or retrieval of basolaterally targeted channels from the biosynthetic pathway.

### **CFTR transcytosis requires microtubule**

To test the contribution of myosinVB (Myo5B) and microtubules (MT), major carriers of transcytotic cargoes (Jerdeva et al., 2010; Tzaban et al., 2009), MTs were disrupted with nocodazole and Myo5B expression was silenced by siRNA. While Myo5B knockdown modestly decreased CFTR apical expression as a consequence of reduced entry of apically endocytosed channel into ARE (Swiatecka-Urban et al., 2007), it failed to interfere with apical transcytosis (Figures 5D and S4A,C). Nocodazole, however, profoundly decreased CFTR transcytosis similarly to TfR (Figures 5D and S4D). This cannot be attributed to the impeded biosynthetic transport of CFTR, as comparable inhibition of transcytosis ( $54.7 \pm 6.7\%$  vs  $50.9 \pm 6.3\%$ ) was observed in dox-OFF cells (Figures 5D and S4E). Considering that the channel endocytosis and recycling rates remained unaltered upon MT disruption (Figure S4F), the decreased CFTR apical expression could be attributed to its impeded transcytosis ( $13.4 \pm 4\%$  in 3h) (Figures S4G and 5D).

## **Transcytosis counteracts CFTR missorting upon disruption of PDZ protein(s) interaction**

N- and O-glycans, GPI-anchors, and cytosolic and transmembrane segments have been identified as apical sorting determinants (Cholon et al., 2009; Kundu et al., 1996; Lisanti et al., 1989; Potter et al., 2006; Sharma et al., 2006). Basolateral targeting signals may partly overlap with internalization motifs of transmembrane cargoes, represented by tyrosine- (YXX $\Phi$ , NPXY) and di-leucine-based (D/EXXXLL) motifs (Stoops and Caplan, 2014).

To identify targeting motifs that may influence CFTR transcytosis efficacy, we inactivated three potential polarized sorting signals (Figure 6A). i) Three di-leucine and tyrosine-based endocytic motifs (Hu et al., 2001) were changed to alanine (K3-CFTR). ii) Two N-linked glycosylation sites (N894D- and N900D-CFTR) were inactivated in the 4<sup>th</sup> extracellular loop, iii) Considering the role of PDZ proteins in apical targeting, tethering and recycling of CFTR, we truncated the PDZ binding motif (DTRL) by eliminating the last six residues ( $\Delta$ 6-CFTR) at the C-terminus. All of these CFTR variants were stably expressed in CFBE (Figure S5A).

Surprisingly, apical transcytosis of  $\Delta$ 6-CFTR, but not K3- or N900D-CFTR, was increased by  $49.5 \pm 7.8\%$ , suggesting that the  $\Delta$ 6 mutation compromised the fidelity of CFTR apical biosynthetic targeting, endocytic recycling or both processes (Figure 6B). The comparable expression level of  $\Delta$ 6- and WT-CFTR-3HA and the inability of  $\Delta$ 6-, but not WT-CFTR to associate with the GST-NHERF1 fusion protein were confirmed (Figure S5B-C). Since transcytotic flux of  $\Delta$ 6-CFTR, but not WT-CFTR was insensitive to translation inhibition (Figure 6C, dox-OFF), the amplified basolateral arrival of  $\Delta$ 6-CFTR likely emanates from missorting at apical endosomes and not from the biosynthetic secretion. This inference is supported by the increased apical internalization ( $18.3 \pm 3.1$  vs  $7.4 \pm 1.2\%/5\text{min}$ ) and impeded recycling ( $20.5 \pm 1.8$  vs  $35.3 \pm 2.0\%/10\text{min}$ ) of  $\Delta$ 6-CFTR relative to WT-CFTR (Figures 6D-E). These data are also in line with CFTR tethering to the subapical actin

cytoskeleton and enhanced channel recycling by PDZ domain proteins NHERFs (Haggie et al., 2004; Swiatecka-Urban et al., 2002), as well as with the ~1.5-fold increased basolateral density of  $\Delta 6$ -CFTR (Figure 6F). The accelerated basolateral transcytosis of  $\Delta 6$ -CFTR mirrors the stimulated apical transcytosis of TfR upon inhibition of its basolateral recycling by AP-1B ablation (Perez Bay et al., 2013). The apical transcytosis of  $\Delta 6$ -CFTR was also augmented in MDCK and LLC-PK1 (Figure 6G), supporting the notion that PDZ protein interaction(s) enhance the fidelity of CFTR polarized sorting/recycling in various epithelia.

Remarkably,  $\Delta 6$ -CFTR displayed similar biochemical and functional apical PM expression as WT-CFTR despite its accelerated internalization and impeded apical recycling, measured by immunostaining, PM ELISA and short circuit current (Isc), respectively (Figure 6H, I). Finally, we could not resolve a detectable difference in the PM turnover of  $\Delta 6$ - and WT-CFTR by PM-ELISA or biotinylation assay (Figure 6J and S5D), suggesting that 2-fold augmented round-trip transcytosis maintains the WT-like apical PM stability of  $\Delta 6$ -CFTR and highlights the sorting capacity and significance of transcytotic pathway to preserve CFTR polarity.

### **NHERF1 association attenuates CFTR basolateral missorting and transcytosis**

To search for additional proteins that may contribute to the recycling fidelity of apically internalized CFTR, the consequence of siRNA ablation of CFTR-interacting PDZ domain proteins was measured (Figures S4B and S5F). The apical transcytosis of WT- but not  $\Delta 6$ -CFTR or TfR was increased only by NHERF1 (EBP50) knockdown (Figure 7A-B). NHERF1 siRNA accelerated the internalization and inhibited the recycling of WT-, but not  $\Delta 6$ -CFTR, at moderately altered CFTR apical density (Figure 7C-E). Finally, we showed that NHERF1 was partly colocalized with internalized CFTR in a subapical compartment (Figures 7F-G and S5G-H). These complementary

results reinforce the functional relevance of NHERF1-CFTR interaction in the channel apical retention and endosomal recycling along the ASE/ARE compartments in CFBE and provide a plausible explanation for the exacerbated basolateral missorting of CFTR upon preventing NHERF1-CFTR association either by C-terminal truncation of CFTR or NHERF1 ablation.

## DISCUSSION

Here we report that apical and basolateral transcytosis represent previously unrecognized membrane trafficking pathways that significantly contribute to the development and maintenance of CFTR apical polarity, as well as the phenotypic suppression of CFTR C-terminal truncations in multiple epithelia, including immortalized and primary human airway. We show that both CFTR apical transcytosis and highly efficient basolateral internalization play a role in counteracting the channel constitutive basolateral missorting and maintaining ~30-fold higher amount of CFTR at the apical than at the basolateral PM in CFBE (Figures S5E and S6). The reduced rate of CFTR transcytosis in MDCK cells and the limited efficiency of CFTR biotinylation relative to ELISA-based assay may explain that CFTR (or EGFR) transcytosis was undetectable previously (Cotton et al., 2013; Swiatecka-Urban et al., 2002).

The physiological significance of CFTR apical transcytosis is illustrated by the >2.1-fold reduction of its half-life at preserved apical internalization upon inhibition of basolateral retrieval. CFTR basolateral accumulation in the absence of apical transcytosis would decrease apical Cl<sup>-</sup> secretion by reducing basolateral Cl<sup>-</sup> entry, causing attenuated coupled water secretion and mucociliary clearance of airway epithelia (Ballard et al., 2002; Farmen et al., 2005).

We also demonstrate that CFTR basolateral delivery predominantly (~65%) originates from apical endocytic vesicles via reversed transcytosis, due to limited fidelity of its apical recycling. A similar phenomenon prevails for endosomal missorting of TfR and EGFR at basolateral endosomes (Cotton et al., 2013; Gravotta et al., 2007). In addition, missorting of newly synthesized CFTR from the TGN fuels ~35% of the channel basolateral delivery, likely in a STX3-dependent manner.

Based on colocalization and functional endosomal ablation studies, we propose that basolaterally internalized CFTR enters transcytotic endosomes (TE), which are EEA1<sup>+</sup> with reduced TfR content,



that fuel the transcellular migration of CFTR in a MT-dependent, but Myo5B-independent pathway (Figure S6). Several observations suggest that CFTR apical transcytosis has some unique characteristics in CFBE: i) Unlike basolateral sorting of TfR, which is thought to proceed at CRE (Gravotta et al., 2012), commitment of CFTR to apical recycling likely takes place before its Rab5-mediated entry into ASE. This inference is supported by the observation that accelerated endocytosis of CFTR lacking its PDZ binding motif displays enhanced basolateral targeting and subsequent apical transcytosis, whereas silencing of proteins along CFTR endocytic sorting (Rab5, EEA1 or SNX17) or recycling (Rab11, ACAP1, or SNX4) failed to do so. ii) The results of CFTR mutagenesis and siRNA screens showed that transcytosis of CFTR in CFBE is independent of N-glycans, AP-1B, Rab3b, Rab17, Rab25 or the exocyst complex that are essential for the apical transcytosis of pIgR, TfR and FcRn (Hunziker and Peters, 1998; Nelms et al., 2017; Perez Bay et al., 2014; Perez Bay et al., 2013; Tzaban et al., 2009; van et al., 2002). iii) Finally, transcytotic CFTR seems to avoid the CRE and ARE compartments that are commonly used by other transcytotic cargoes (Jerdeva et al., 2010; Lalioti et al., 2016). Interestingly, constitutive TfR apical transcytosis in AP-1B-expressing MDCK (Perez Bay et al., 2013) or CFBE (Figures S3C-E and S4H) also avoids the Rab11<sup>+</sup> ARE, similar to that of FcRn (Tzaban et al., 2009). Hence, it is plausible that in some epithelia the transcytotic pathway of CFTR and other cargoes intermix in a common endosomal compartment prior to apical exocytosis that is distinct from the ARE. Indeed, sorting endosomes are composed of unique microdomains that sort cargoes with different mechanisms (i.e. PDZ motif- and actin-dependent recycling of  $\beta_2$  adrenergic receptor ( $\beta_2$ -AR) and bulk recycling of TfR (Puthenveedu et al., 2010)). This would explain the modest colocalization between CFTR and Tf at subapical pole of CFBE, as well as the EEA1- and Rab-5-independent CFTR transcytosis, despite the channel residence in EEA1<sup>+</sup> endosomes.

Comparison of the exocytotic machinery of apical CFTR with other transcytotic cargoes derived from the biosynthetic, recycling, and transcytotic pathways of airway epithelia remains to be investigated. Intriguingly, we failed to detect a significant reduction of CFTR apical transcytosis and PM density upon ablation of Myo5B, which has been implicated in maintaining CFTR apical expression along recycling and secretory pathways in CFBE and CaCo2 cells (Swiatecka-Urban et al., 2007; Vogel et al., 2015). Recent studies also failed to detect profound changes in CFTR functional expression in intestinal epithelia expressing either an inactive Myo5B or following Myo5B knockdown (Kravtsov et al., 2016). Furthermore, Myo5B-independent apical polarization of CFTR is in line with the augmented Cl<sup>-</sup> secretion in Microvillus inclusion disease, caused by loss-of-function of Myo5B (Kravtsov et al., 2016).

Our results expand the established role of NHERF1 in CFTR traffic at multiple cellular locations. i) By tethering CFTR to the subapical cytoskeleton, NHERF1 enhances the channel apical retention (Haggie et al., 2004; Swiatecka-Urban et al., 2002). Importantly, this mechanism is absent at the basolateral PM, due to considerably reduced concentration of NHERFs, ezrin and cortical actin (Reczek et al., 1997; Short et al., 1998), accounting for CFTR fast internalization and limited recycling, ensuring its low basolateral PM density. ii) We provide evidence for enhanced colocalization of NHERF1 with the endocytic pool of WT-CFTR relative to that of  $\Delta 6$ -CFTR (Figure 7F, G), supporting the paradigm that NHERF1-mediated sorting directs the channel towards recycling at subapical endosomes (ASE and/or ARE) (Cardone et al., 2015; Cushing et al., 2008). iii) Finally, we demonstrate that PDZ motif elimination has negligible influence on CFTR apical expression, transport activity and stability. Increased basolateral internalization and apical transcytosis flux of basolateral CFTR counteract the channel accelerated removal and decreased recycling at the apical PM. These results expand previous observations obtained on CFTR variants with compromised

binding of PDZ proteins (Benharouga et al., 2003; Ostedgaard et al., 2003) and explain the isolated elevation of sweat  $\text{Cl}^-$  concentration in the absence of pancreatic and lung phenotype in individuals harboring a single copy of C-terminal 26 residues of CFTR (S1455X-CFTR) (Mickle et al., 1998). Finally, upregulated CFTR compensatory transcytosis may also explain the mild CF cellular phenotype (Ameen et al., 2007) of the naturally occurring N287Y-CFTR mutant that causes accelerated apical internalization (Silvis et al., 2003).

Whether CFTR transcytotic routes are affected by CF-causing mutations and can influence a non-native channel degradation via ubiquitin-dependent lysosomal targeting from the PM, such as  $\Delta\text{F508}$  (Okiyoneda et al., 2018), remains to be explored. Interestingly, a CF-causing folding mutant, P67L-CFTR (Bagdany et al., 2017; Sabusap et al., 2016), displays considerably reduced transcytotic flux that can be restored to that of WT upon folding correction with VX-809 (data not shown). Intriguingly, overexpression of NHERF1 or ablation of CAL (CFTR associated ligand) that facilitates CFTR lysosomal targeting at the TGN partly rescues the PM expression of  $\Delta\text{F508}$  (Guerra et al., 2005; Wolde et al., 2007). Considering that deletion of the PDZ motif decreased CFTR biosynthetic delivery to the basolateral PM (Fig. 6C, dox-OFF), we speculate that NHERF1 overexpression may rescue  $\Delta\text{F508}$  not only by increasing its retention/recycling at the apical PM but also by promoting its biosynthetic over endocytic basolateral missorting, which may further reduce the degradation propensity of the channel by reducing basolateral transcytosis.

## **EXPERIMENTAL PROCEDURES**

### **CFTR cell surface ELISA and transcytosis assay**

Apical density and apical transcytosis were measured by PM ELISA. CFTR was labelled with anti-HA Ab in the apical (apical density) or basolateral (transcytosis) compartment, respectively, at 37°C for 0.5-4h. Apical CFTR-anti-HA Ab complexes were quantified with PM ELISA, using horseradish peroxidase (HRP)-conjugated anti-mouse Ab and the HRP substrate Amplex Red (Invitrogen) as described (Glozman et al., 2009). CFTR apical transcytosis was expressed relative to steady-state apical density of the channel ( $\% \text{ Ap transcytosis} = (\text{Ap signal}^{\text{transcytosis}} / \text{Ap signal}^{\text{ap density}}) * 100$ ), measured in parallel samples. TfR apical transcytosis was monitored with HRP-Tf (5ug/ml) and expressed relative to its basolateral PM expression. Round-trip CFTR transcytosis was determined by incubating the cells with mouse anti-HA Ab in the apical chamber and HRP-anti-mouse Fab (Jackson ImmunoResearch) in the basolateral chamber for 4 to 24h at 37°C and measuring the HRP activity at the apical PM with Amplex Red.

### **CFTR internalization and recycling assays**

CFTR internalization rate was measured by determining the CFTR-Ab complexes disappearance after 5 min at 37°C from the apical PM by ELISA, as described (Glozman et al., 2009).

CFTR recycling rate was assessed by monitoring the exocytosis of internalized (30min, 37°C) CFTR-Ab complexes at the apical PM as before (Okiyoneda et al., 2018). Anti-HA Ab remaining at the PM was blocked with anti-mouse monovalent Fab on ice (Jackson ImmunoResearch) and recycling of endocytosed CFTR-Ab complexes was quantified after 10 min at 37°C by PM ELISA. CFTR recycling efficiency was expressed as the percentage of endocytosed CFTR, after correcting for the blocking efficiency of the anti-mouse Fab.

### **Time course of polarized delivery of newly synthesized CFTR-HRP**

To measure newly translated CFTR delivery kinetics to the apical and basolateral PM, CFTR-HRP expression was induced for ~3.5h at 37°C. Then cells were washed with buffer H (154 mM NaCl, 3 mM KCl, 10 mM Hepes, 1mM MgCl<sub>2</sub>, 0.1 mM CaCl<sub>2</sub>, 10 mM glucose, pH 7.8) and incubated further in buffer H, complemented with Amplex Red at 37°C. Apical and basolateral media were sampled for Amplex Red fluorescence in every 5 min for ~20 min. Non-induced cells were used to determine the background fluorescence.

## **SUPPLEMENTAL INFORMATION**

Supplemental information includes 6 Figures, 3 tables and extended methods.

## **AUTHOR CONTRIBUTIONS:**

A.B.M., F.B. and G.L.L conceived the study. A.B.M., F.B., A.S., R.F., G.V. and H.X. performed and analysed the experiments. A.B.M. and G.L.L. wrote the manuscript with contributions from all authors.

## **ACKNOWLEDGEMENTS**

We are grateful to D. Gruenert, J.W. Hanrahan and B. Scholte for cell lines and W. E. Finkbeiner for primary HBE. We thank R. Robert and R.G. Avramescu for help with initial Isc and qPCR measurements, respectively. Post-labeling steps and EM imaging were performed at the EM facility of the Department of Pharmacology, McGill University. The core facility of W.E. Finkbeiner (Department of Pathology, University of California, San Francisco) was supported by grants from National Institute of Health [DK072517] and Cystic Fibrosis Foundation Research and Translational Core Center [VERKMA15R0]. This work was supported by the Canadian Institutes of Health

Research, NIH-NIDDK, and Cystic Fibrosis Canada to G.L.L. A.B.M. was supported by a travel grant from Cystic Fibrosis Canada. F.B. was a recipient of a Richard & Edith Strauss Fellowship, McGill University. G.L.L. is a Canada Research Chair.

The authors declare no competing financial interests.

## REFERENCES

- Ameen, N., Silvis, M., and Bradbury, N.A. (2007). Endocytic trafficking of CFTR in health and disease. *J Cyst Fibros* 6, 1-14.
- Anderson, E., Maday, S., Sfakianos, J., Hull, M., Winckler, B., Sheff, D., Folsch, H., and Mellman, I. (2005). Transcytosis of NgCAM in epithelial cells reflects differential signal recognition on the endocytic and secretory pathways. *The Journal of cell biology* 170, 595-605.
- Bagdany, M., Veit, G., Fukuda, R., Avramescu, R.G., Okiyonedo, T., Baaklini, I., Singh, J., Sovak, G., Xu, H., Apaja, P.M., *et al.* (2017). Chaperones rescue the energetic landscape of mutant CFTR at single molecule and in cell. *Nat Commun* 8, 398.
- Ballard, S.T., Trout, L., Mehta, A., and Inglis, S.K. (2002). Liquid secretion inhibitors reduce mucociliary transport in glandular airways. *Am J Physiol Lung Cell Mol Physiol* 283, L329-335.
- Benharouga, M., Sharma, M., So, J., Haardt, M., Drzymala, L., Popov, M., Schwapach, B., Grinstein, S., Du, K., and Lukacs, G.L. (2003). The role of the C terminus and Na<sup>+</sup>/H<sup>+</sup> exchanger regulatory factor in the functional expression of cystic fibrosis transmembrane conductance regulator in nonpolarized cells and epithelia. *The Journal of biological chemistry* 278, 22079-22089.
- Brone, B., and Eggermont, J. (2005). PDZ proteins retain and regulate membrane transporters in polarized epithelial cell membranes. *American journal of physiology* 288, C20-29.
- Cardone, R.A., Greco, M.R., Zeeberg, K., Zaccagnino, A., Saccomano, M., Bellizzi, A., Bruns, P., Menga, M., Pilarsky, C., Schwab, A., *et al.* (2015). A novel NHE1-centered signaling cassette drives epidermal growth factor receptor-dependent pancreatic tumor metastasis and is a target for combination therapy. *Neoplasia* 17, 155-166.
- Cholon, D.M., O'Neal, W.K., Randell, S.H., Riordan, J.R., and Gentsch, M. (2009). Modulation of endocytic trafficking and apical stability of CFTR in primary human airway epithelial cultures. *Am J Physiol Lung Cell Mol Physiol*, 00016.02009.
- Collaco, A., Marathe, J., Kohnke, H., Kravstov, D., and Ameen, N. (2010). Syntaxin 3 is necessary for cAMP- and cGMP-regulated exocytosis of CFTR: implications for enterotoxigenic diarrhea. *American journal of physiology* 299, C1450-1460.
- Cotton, C.U., Hobert, M.E., Ryan, S., and Carlin, C.R. (2013). Basolateral EGF receptor sorting regulated by functionally distinct mechanisms in renal epithelial cells. *Traffic* 14, 337-354.
- Cresawn, K.O., Potter, B.A., Oztan, A., Guerriero, C.J., Ihrke, G., Goldenring, J.R., Apodaca, G., and Weisz, O.A. (2007). Differential involvement of endocytic compartments in the biosynthetic traffic of apical proteins. *The EMBO journal* 26, 3737-3748.
- Cushing, P.R., Fellows, A., Villone, D., Boisguerin, P., and Madden, D.R. (2008). The relative binding affinities of PDZ partners for CFTR: a biochemical basis for efficient endocytic recycling. *Biochemistry* 47, 10084-10098.
- Cutting, G.R. (2015). Cystic fibrosis genetics: from molecular understanding to clinical application. *Nat Rev Genet* 16, 45-56.
- Ehrhardt, C., Collnot, E.M., Baldes, C., Becker, U., Laue, M., Kim, K.J., and Lehr, C.M. (2006). Towards an in vitro model of cystic fibrosis small airway epithelium: characterisation of the human bronchial epithelial cell line CFBE41o. *Cell Tissue Res* 323, 405-415.
- Farmen, S.L., Karp, P.H., Ng, P., Palmer, D.J., Koehler, D.R., Hu, J., Beaudet, A.L., Zabner, J., and Welsh, M.J. (2005). Gene transfer of CFTR to airway epithelia: low levels of expression are sufficient to correct Cl<sup>-</sup> transport and overexpression can generate basolateral CFTR. *Am J Physiol Lung Cell Mol Physiol* 289, L1123-1130.

- Fu, L., and Sztul, E. (2009). ER-associated complexes (ERACs) containing aggregated cystic fibrosis transmembrane conductance regulator (CFTR) are degraded by autophagy. *Eur J Cell Biol* 88, 215-226.
- Gee, H.Y., Noh, S.H., Tang, B.L., Kim, K.H., and Lee, M.G. (2011). Rescue of DeltaF508-CFTR trafficking via a GRASP-dependent unconventional secretion pathway. *Cell* 146, 746-760.
- Gentzsch, M., Chang, X.B., Cui, L., Wu, Y., Ozols, V.V., Choudhury, A., Pagano, R.E., and Riordan, J.R. (2004). Endocytic trafficking routes of wild type and DeltaF508 cystic fibrosis transmembrane conductance regulator. *Molecular biology of the cell* 15, 2684-2696.
- Giovannone, A.J., Reales, E., Bhattaram, P., Fraile-Ramos, A., and Weimbs, T. (2017). Monoubiquitination of syntaxin 3 leads to retrieval from the basolateral plasma membrane and facilitates cargo recruitment to exosomes. *Molecular biology of the cell* 28, 2843-2853.
- Glozman, R., Okiyoneda, T., Mulvihill, C.M., Rini, J.M., Barriere, H., and Lukacs, G.L. (2009). N-glycans are direct determinants of CFTR folding and stability in secretory and endocytic membrane traffic. *The Journal of cell biology* 184, 847-862.
- Gravotta, D., Carvajal-Gonzalez, J.M., Mattera, R., Deborde, S., Banfelder, J.R., Bonifacino, J.S., and Rodriguez-Boulan, E. (2012). The clathrin adaptor AP-1A mediates basolateral polarity. *Dev Cell* 22, 811-823.
- Gravotta, D., Deora, A., Perret, E., Oyanadel, C., Soza, A., Schreiner, R., Gonzalez, A., and Rodriguez-Boulan, E. (2007). AP1B sorts basolateral proteins in recycling and biosynthetic routes of MDCK cells. *Proceedings of the National Academy of Sciences of the United States of America* 104, 1564-1569.
- Guerra, L., Fanelli, T., Favia, M., Riccardi, S.M., Busco, G., Cardone, R.A., Carrabino, S., Weinman, E.J., Reshkin, S.J., Conese, M., *et al.* (2005). Na<sup>+</sup>/H<sup>+</sup> exchanger regulatory factor isoform 1 overexpression modulates cystic fibrosis transmembrane conductance regulator (CFTR) expression and activity in human airway 16HBE14o- cells and rescues DeltaF508 CFTR functional expression in cystic fibrosis cells. *The Journal of biological chemistry* 280, 40925-40933.
- Haggie, P.M., Stanton, B.A., and Verkman, A.S. (2004). Increased Diffusional Mobility of CFTR at the Plasma Membrane after Deletion of Its C-terminal PDZ Binding Motif. *Journal of Biological Chemistry* 279, 5494-5500.
- Henry, L., and Sheff, D.R. (2008). Rab8 regulates basolateral secretory, but not recycling, traffic at the recycling endosome. *Molecular biology of the cell* 19, 2059-2068.
- Holleran, J.P., Zeng, J., Frizzell, R.A., and Watkins, S.C. (2013). Regulated recycling of mutant CFTR is partially restored by pharmacological treatment. *J Cell Sci* 126, 2692-2703.
- Hu, W., Howard, M., and Lukacs, G.L. (2001). Multiple endocytic signals in the C-terminal tail of the cystic fibrosis transmembrane conductance regulator. *The Biochemical journal* 354, 561-572.
- Hunziker, W., and Peters, P.J. (1998). Rab17 localizes to recycling endosomes and regulates receptor-mediated transcytosis in epithelial cells. *The Journal of biological chemistry* 273, 15734-15741.
- Jerdeva, G.V., Tesar, D.B., Huey-Tubman, K.E., Ladinsky, M.S., Fraser, S.E., and Bjorkman, P.J. (2010). Comparison of FcRn- and pIgR-Mediated Transport in MDCK Cells by Fluorescence Confocal Microscopy. *Traffic* 11, 1205-1220.
- Kravtsov, D.V., Ahsan, M.K., Kumari, V., van Ijzendoorn, S.C., Reyes-Mugica, M., Kumar, A., Gujral, T., Dudeja, P.K., and Ameen, N.A. (2016). Identification of intestinal ion transport defects in microvillus inclusion disease. *Am J Physiol Gastrointest Liver Physiol* 311, G142-155.



- Kundu, A., Avalos, R.T., Sanderson, C.M., and Nayak, D.P. (1996). Transmembrane domain of influenza virus neuraminidase, a type II protein, possesses an apical sorting signal in polarized MDCK cells. *Journal of virology* *70*, 6508-6515.
- Lalioi, V., Peiro, R., Perez-Berlanga, M., Tsuchiya, Y., Munoz, A., Villalba, T., Sanchez, C., and Sandoval, I.V. (2016). Basolateral sorting and transcytosis define the Cu<sup>+</sup>-regulated translocation of ATP7B to the bile canaliculus. *J Cell Sci*.
- Li, J., Peters, P.J., Bai, M., Dai, J., Bos, E., Kirchhausen, T., Kandror, K.V., and Hsu, V.W. (2007). An ACAP1-containing clathrin coat complex for endocytic recycling. *The Journal of cell biology* *178*, 453-464.
- Lisanti, M.P., Caras, I.W., Davitz, M.A., and Rodriguez-Boulan, E. (1989). A glycopospholipid membrane anchor acts as an apical targeting signal in polarized epithelial cells. *The Journal of cell biology* *109*, 2145-2156.
- Mickle, J.E., Macek, M., Jr., Fulmer-Smentek, S.B., Egan, M.M., Schwiebert, E., Guggino, W., Moss, R., and Cutting, G.R. (1998). A mutation in the cystic fibrosis transmembrane conductance regulator gene associated with elevated sweat chloride concentrations in the absence of cystic fibrosis. *Human Molecular Genetics* *7*, 729-735.
- Milewski, M.I., Lopez, A., Jurkowska, M., Larusch, J., and Cutting, G.R. (2005). PDZ-binding motifs are unable to ensure correct polarized protein distribution in the absence of additional localization signals. *FEBS letters* *579*, 483-487.
- Milewski, M.I., Mickle, J.E., Forrest, J.K., Stafford, D.M., Moyer, B.D., Cheng, J., Guggino, W.B., Stanton, B.A., and Cutting, G.R. (2001). A PDZ-binding motif is essential but not sufficient to localize the C terminus of CFTR to the apical membrane. *J Cell Sci* *114*, 719-726.
- Moyer, B.D., Denton, J., Karlson, K.H., Reynolds, D., Wang, S., Mickle, J.E., Milewski, M., Cutting, G.R., Guggino, W.B., Li, M., *et al.* (1999). A PDZ-interacting domain in CFTR is an apical membrane polarization signal. *The Journal of Clinical Investigation* *104*, 1353-1361.
- Nelms, B., Dalomba, N.F., and Lencer, W. (2017). A targeted RNAi screen identifies factors affecting diverse stages of receptor-mediated transcytosis. *The Journal of cell biology* *216*, 511-525.
- Okiyoneda, T., Veit, G., Sakai, R., Aki, M., Fujihara, T., Higashi, M., Susuki-Miyata, S., Miyata, M., Fukuda, N., Yoshida, A., *et al.* (2018). Chaperone-Independent Peripheral Quality Control of CFTR by RFFL E3 Ligase. *Dev Cell* *44*, 694-708 e697.
- Ostedgaard, L.S., Randak, C., Rokhlina, T., Karp, P., Vermeer, D., Ashbourne Excoffon, K.J., and Welsh, M.J. (2003). Effects of C-terminal deletions on cystic fibrosis transmembrane conductance regulator function in cystic fibrosis airway epithelia. *Proceedings of the National Academy of Sciences of the United States of America* *100*, 1937-1942.
- Perez Bay, A.E., Schreiner, R., Benedicto, I., and Rodriguez-Boulan, E.J. (2014). Galectin-4-mediated transcytosis of transferrin receptor. *J Cell Sci* *127*, 4457-4469.
- Perez Bay, A.E., Schreiner, R., Mazzoni, F., Carvajal-Gonzalez, J.M., Gravotta, D., Perret, E., Lehmann Mantaras, G., Zhu, Y.S., and Rodriguez-Boulan, E.J. (2013). The kinesin KIF16B mediates apical transcytosis of transferrin receptor in AP-1B-deficient epithelia. *The EMBO journal* *32*, 2125-2139.
- Peters, K.W., Okiyoneda, T., Balch, W.E., Braakman, I., Brodsky, J.L., Guggino, W.B., Penland, C.M., Pollard, H.B., Sorscher, E.J., Skach, W.R., *et al.* (2011). CFTR Folding Consortium: methods available for studies of CFTR folding and correction. *Methods in molecular biology* *742*, 335-353.

- Polishchuk, R., Di Pentima, A., and Lippincott-Schwartz, J. (2004). Delivery of raft-associated, GPI-anchored proteins to the apical surface of polarized MDCK cells by a transcytotic pathway. *Nat Cell Biol* 6, 297-307.
- Potter, B.A., Hughey, R.P., and Weisz, O.A. (2006). Role of N- and O-glycans in polarized biosynthetic sorting. *American Journal of Physiology - Cell Physiology* 290, C1-C10.
- Puthenveedu, M.A., Lauffer, B., Temkin, P., Vistein, R., Carlton, P., Thorn, K., Taunton, J., Weiner, O.D., Parton, R.G., and von Zastrow, M. (2010). Sequence-Dependent Sorting of Recycling Proteins by Actin-Stabilized Endosomal Microdomains. *Cell* 143, 761-773.
- Reczek, D., Berryman, M., and Bretscher, A. (1997). Identification of EBP50: A PDZ-containing phosphoprotein that associates with members of the ezrin-radixin-moesin family. *The Journal of cell biology* 139, 169-179.
- Riordan, J.R. (2008). CFTR Function and Prospects for Therapy. *Annual Review of Biochemistry* 77, 701-726.
- Rowe, S.M., Miller, S., and Sorscher, E.J. (2005). Cystic fibrosis. *N Engl J Med* 352, 1992-2001.
- Sabusap, C.M., Wang, W., McNicholas, C.M., Chung, W.J., Fu, L., Wen, H., Mazur, M., Kirk, K.L., Collawn, J.F., Hong, J.S., *et al.* (2016). Analysis of cystic fibrosis-associated P67L CFTR illustrates barriers to personalized therapeutics for orphan diseases. *JCI Insight* 1.
- Schnur, A., Hegyi, P., Rousseau, S., Lukacs, G.L., and Veit, G. (2016). Epithelial Anion Transport as Modulator of Chemokine Signaling. *Mediators Inflamm* 2016, 7596531.
- Sharma, M., Pampinella, F., Nemes, C., Benharouga, M., So, J., Du, K., Bache, K.G., Papsin, B., Zerangue, N., Stenmark, H., *et al.* (2004). Misfolding diverts CFTR from recycling to degradation: quality control at early endosomes. *The Journal of cell biology* 164, 923-933.
- Sharma, N., Low, S.H., Misra, S., Pallavi, B., and Weimbs, T. (2006). Apical targeting of syntaxin 3 is essential for epithelial cell polarity. *The Journal of cell biology* 173, 937-948.
- Short, D.B., Trotter, K.W., Reczek, D., Kreda, S.M., Bretscher, A., Boucher, R.C., Stutts, M.J., and Milgram, S.L. (1998). An apical PDZ protein anchors the cystic fibrosis transmembrane conductance regulator to the cytoskeleton. *The Journal of biological chemistry* 273, 19797-19801.
- Silvis, M.R., Picciano, J.A., Bertrand, C., Weixel, K., Bridges, R.J., and Bradbury, N.A. (2003). A mutation in the cystic fibrosis transmembrane conductance regulator generates a novel internalization sequence and enhances endocytic rates. *The Journal of biological chemistry* 278, 11554-11560.
- Solis, G.P., Hulsbusch, N., Radon, Y., Katanaev, V.L., Plattner, H., and Stuermer, C.A. (2013). Reggies/flotillins interact with Rab11a and SNX4 at the tubulovesicular recycling compartment and function in transferrin receptor and E-cadherin trafficking. *Molecular biology of the cell* 24, 2689-2702.
- Steinberg, F., Heesom, K.J., Bass, M.D., and Cullen, P.J. (2012). SNX17 protects integrins from degradation by sorting between lysosomal and recycling pathways. *The Journal of cell biology* 197, 219-230.
- Stoops, E.H., and Caplan, M.J. (2014). Trafficking to the apical and basolateral membranes in polarized epithelial cells. *Journal of the American Society of Nephrology : JASN* 25, 1375-1386.
- Sun, F., Hug, M.J., Lewarchik, C.M., Yun, C.H., Bradbury, N.A., and Frizzell, R.A. (2000). E3KARP mediates the association of ezrin and protein kinase A with the cystic fibrosis transmembrane conductance regulator in airway cells. *The Journal of biological chemistry* 275, 29539-29546.

- Swiatecka-Urban, A., Duhaime, M., Coutermarsh, B., Karlson, K.H., Collawn, J., Milewski, M., Cutting, G.R., Guggino, W.B., Langford, G., and Stanton, B.A. (2002). PDZ Domain Interaction Controls the Endocytic Recycling of the Cystic Fibrosis Transmembrane Conductance Regulator. *Journal of Biological Chemistry* 277, 40099-40105.
- Swiatecka-Urban, A., Talebian, L., Kanno, E., Moreau-Marquis, S., Coutermarsh, B., Hansen, K., Karlson, K.H., Barnaby, R., Cheney, R.E., Langford, G.M., *et al.* (2007). Myosin Vb is required for trafficking of the cystic fibrosis transmembrane conductance regulator in Rab11a-specific apical recycling endosomes in polarized human airway epithelial cells. *The Journal of biological chemistry* 282, 23725-23736.
- Takeda, T., Yamazaki, H., and Farquhar, M.G. (2003). Identification of an apical sorting determinant in the cytoplasmic tail of megalin. *American journal of physiology* 284, C1105-1113.
- Tzaban, S., Massol, R.H., Yen, E., Hamman, W., Frank, S.R., Lapierre, L.A., Hansen, S.H., Goldenring, J.R., Blumberg, R.S., and Lencer, W.I. (2009). The recycling and transcytotic pathways for IgG transport by FcRn are distinct and display an inherent polarity. *The Journal of cell biology* 185, 673-684.
- van, I.S.C., Tuvim, M.J., Weimbs, T., Dickey, B.F., and Mostov, K.E. (2002). Direct interaction between Rab3b and the polymeric immunoglobulin receptor controls ligand-stimulated transcytosis in epithelial cells. *Dev Cell* 2, 219-228.
- Varga, K., Goldstein, R.F., Jurkuvenaite, A., Chen, L., Matalon, S., Sorscher, E.J., Bebok, Z., and Collawn, J.F. (2008). Enhanced cell-surface stability of rescued DeltaF508 cystic fibrosis transmembrane conductance regulator (CFTR) by pharmacological chaperones. *The Biochemical journal* 410, 555-564.
- Veit, G., Avramescu, R.G., Perdomo, D., Phuan, P.W., Bagdany, M., Apaja, P.M., Borot, F., Szollosi, D., Wu, Y.S., Finkbeiner, W.E., *et al.* (2014). Some gating potentiators, including VX-770, diminish DeltaF508-CFTR functional expression. *Sci Transl Med* 6, 246ra297.
- Veit, G., Bossard, F., Goepf, J., Verkman, A.S., Galletta, L.J., Hanrahan, J.W., and Lukacs, G.L. (2012). Proinflammatory cytokine secretion is suppressed by TMEM16A or CFTR channel activity in human cystic fibrosis bronchial epithelia. *Molecular biology of the cell* 23, 4188-4202.
- Vogel, G.F., Klee, K.M., Janecke, A.R., Muller, T., Hess, M.W., and Huber, L.A. (2015). Cargo-selective apical exocytosis in epithelial cells is conducted by Myo5B, Slp4a, Vamp7, and Syntaxin 3. *The Journal of cell biology* 211, 587-604.
- Wolde, M., Fellows, A., Cheng, J., Kivenson, A., Coutermarsh, B., Talebian, L., Karlson, K., Piserchio, A., Mierke, D.F., Stanton, B.A., *et al.* (2007). Targeting CAL as a negative regulator of DeltaF508-CFTR cell-surface expression: an RNA interference and structure-based mutagenetic approach. *The Journal of biological chemistry* 282, 8099-8109.
- Yoo, J.S., Moyer, B.D., Bannykh, S., Yoo, H.M., Riordan, J.R., and Balch, W.E. (2002). Non-conventional trafficking of the cystic fibrosis transmembrane conductance regulator through the early secretory pathway. *The Journal of biological chemistry* 277, 11401-11409.

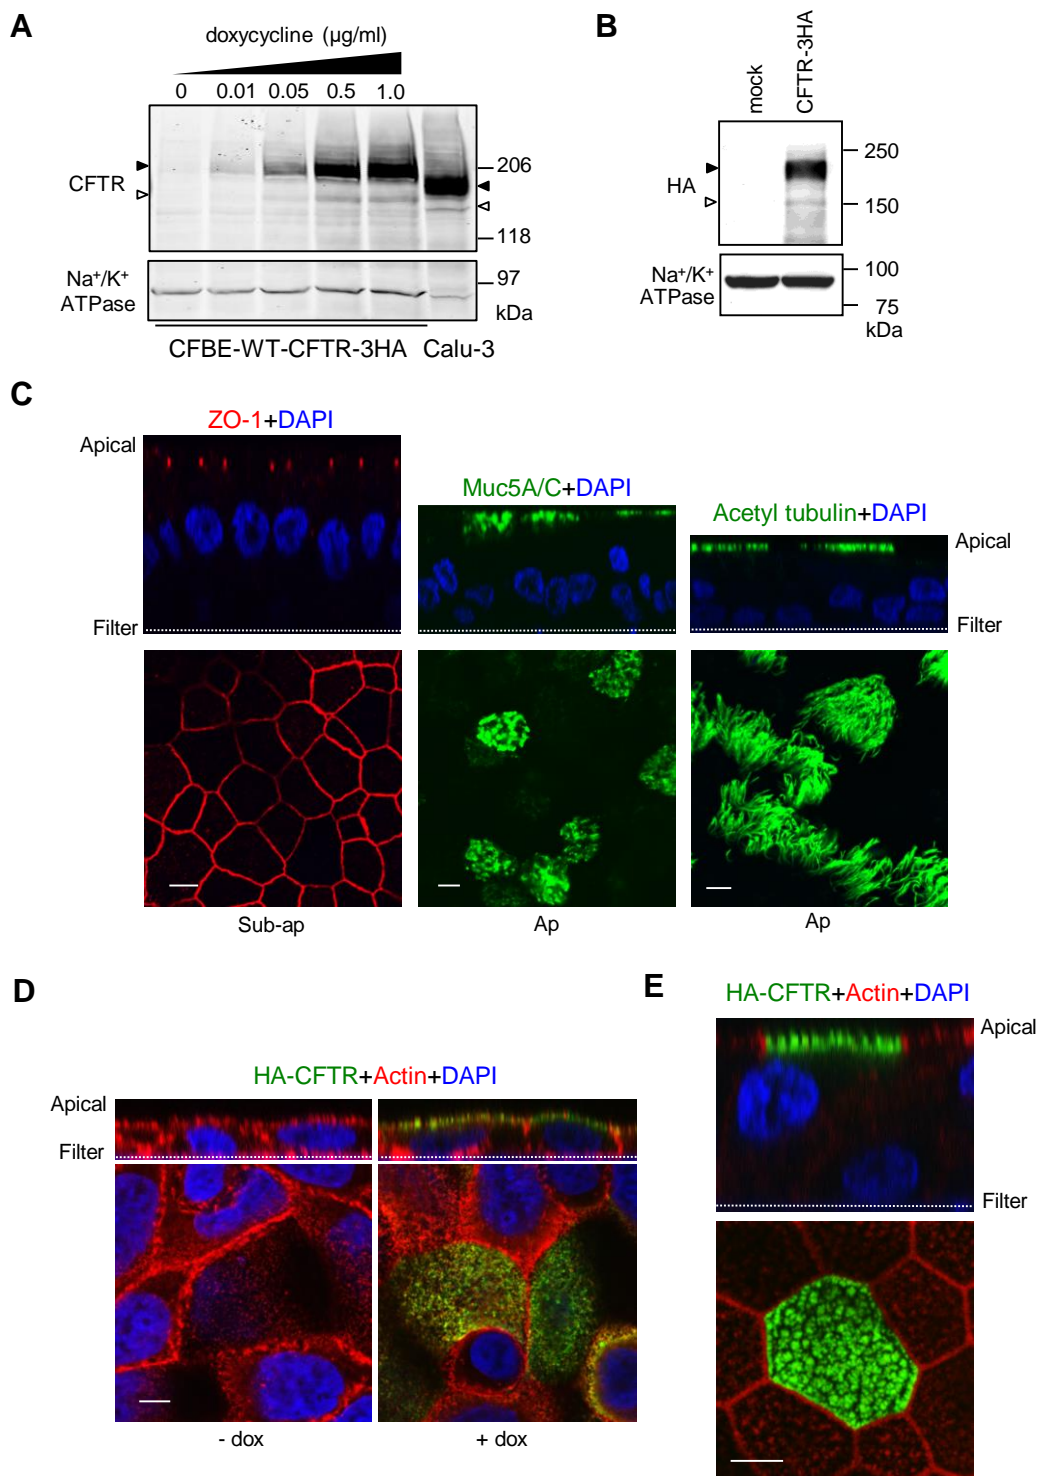

Figure 1

**Figure 1. Characterization of human CF bronchial epithelial models to study CFTR polarized sorting.**

(A-B) Immunoblot analysis of CFTR-3HA expression (A) in CFBE after 3 days doxycycline induction and (B) following lentivirus transduction of CR-HBE. For comparison, equal amount of Calu-3 lysate was loaded (A). Filled and empty arrowheads indicate complex- and core-glycosylated CFTR, respectively. Na<sup>+</sup>/K<sup>+</sup> ATPase was probed as loading control.

(C) CR-HBE were differentiated at air liquid interface (ALI) and stained for tight junction (ZO-1, red), mucin 5 (muc5A/C, green), cilia (acetylated-tubulin, green), and nuclei (DAPI, blue). Cells were visualized by LCFM. Top and lower panels are vertical and horizontal optical sections, respectively.

(D-E) WT-CFTR-3HA is apically expressed in CFBE (D) and CR-HBE (E) cells. Cells were stained for WT-CFTR-3HA (green), actin (red) and DAPI (blue). Scale bar: 5 μm. Representative of at least 3 independent experiments.

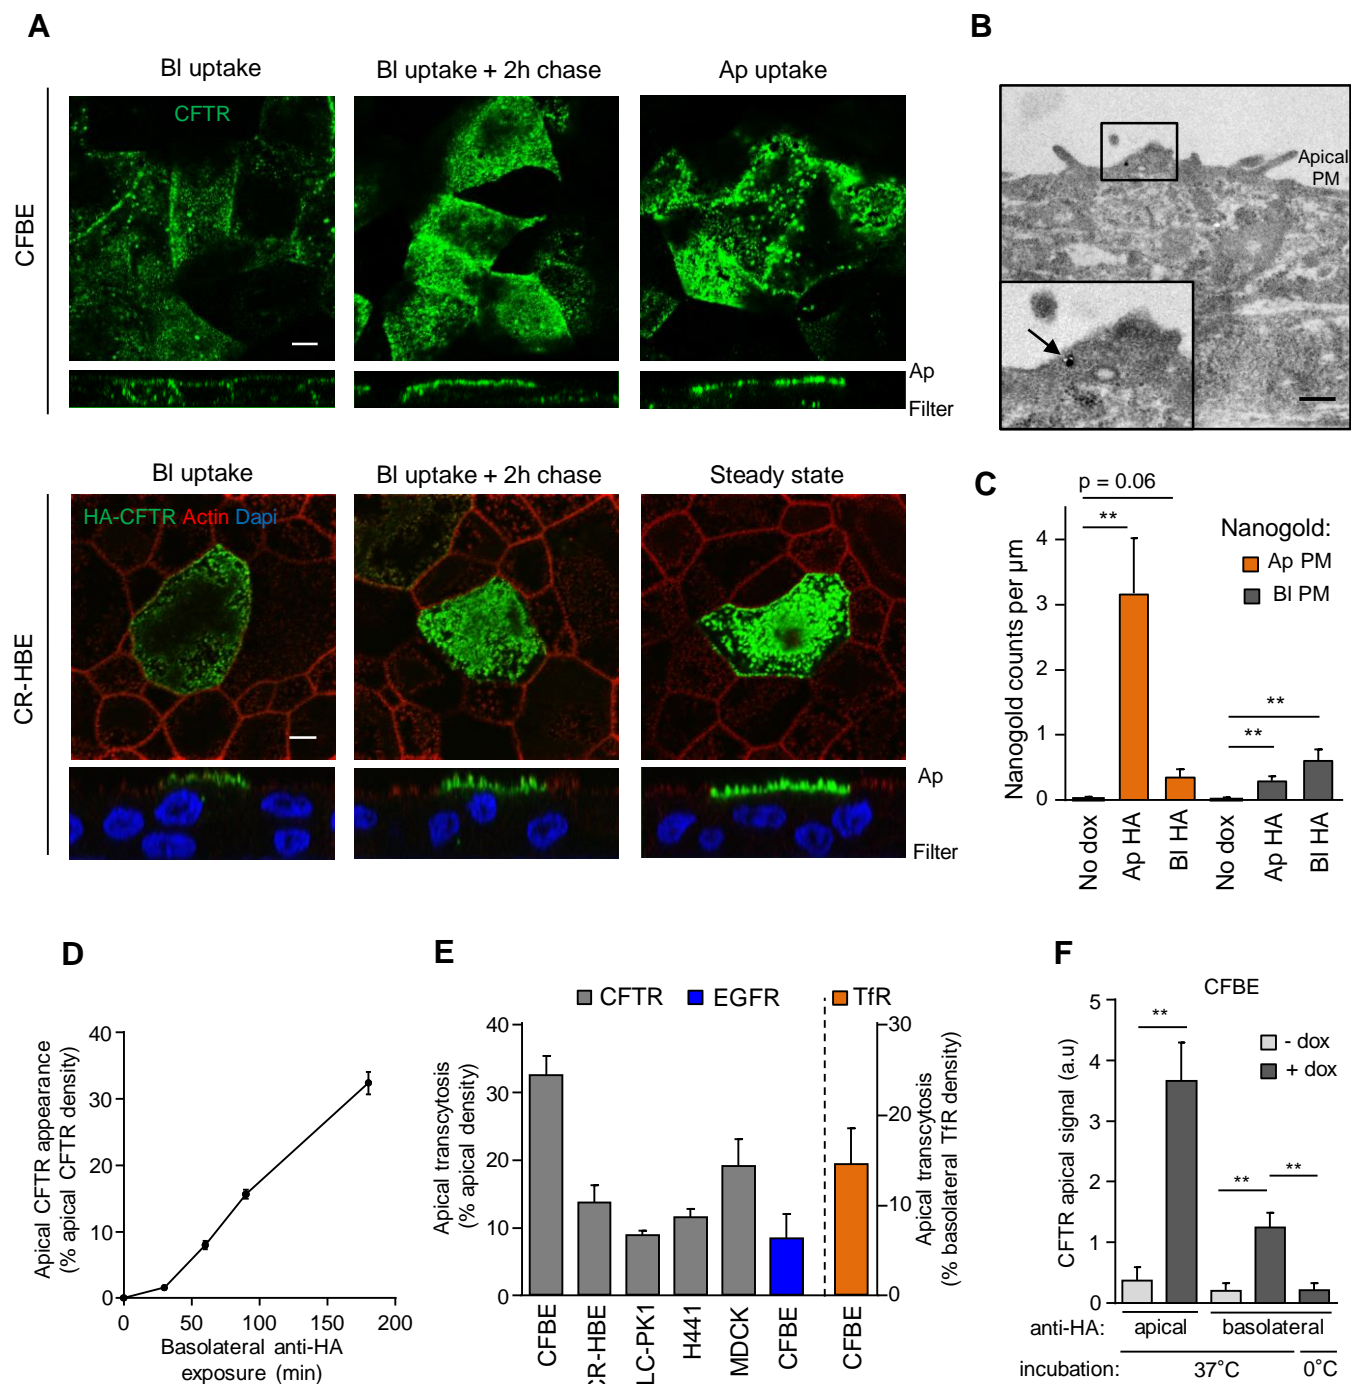

Figure 2

**Figure 2. CFTR is apically transcytosed in human airway epithelia.**

(A) CFTR-3HA was labeled with anti-HA Ab capture (3h, 37°C) from the basolateral (Bl) or the apical (Ap) compartment in CFBE or CR-HBE. Cells were chased for 2h (37°C) in the absence of anti-HA Ab. CFTR-anti-HA Ab complexes were visualized with A488-anti-mouse Ab and LCFM. Lower panels represent z-sections. Scale bar: 5  $\mu$ m.

(B-C) Monitoring CFTR transcytosis with immuno-EM. (B) Immuno-EM detection of CFTR-3HA at the apical PM after basolateral labeling with anti-HA (3h, 37°C) in CFBE. CFTR-anti-HA complexes labeled with secondary Ab decorated nanogold (arrow). Insert represents a higher magnification of the ROI. Scale bar, 0.5  $\mu$ m. (C) CFTR expressing or non-expressing (no dox) CFBE cells were labeled either by apical (Ap) or basolateral (Bl) anti-HA Ab capture for 3h (37°C). CFTR-anti-HA complexes were visualized with anti-mouse Ab decorated nanogold particle as in panel B. The number of nanogold particle per  $\mu$ m was counted along the apical and basolateral PM segments (n=21-34 ROI/condition in +dox and no-dox, n=2-3 independent experiments, Mann-Whitney U-test).

(D) CFTR apical transcytosis was measured over time as in Figure S2B (n=2-10).

(E) Apical transcytosis of CFTR-3HA, and endogenous EGFR, and TfR were measured as described in Methods in the indicated cells (n=3-10).

(F) Apical transcytosis of CFTR is abolished when the channel is basolaterally labeled by anti-HA Ab for 3h on ice or CFTR transcription was not induced (no dox) (n=4).

Data are means  $\pm$  SEM on each panel, \*\* p<0.01.

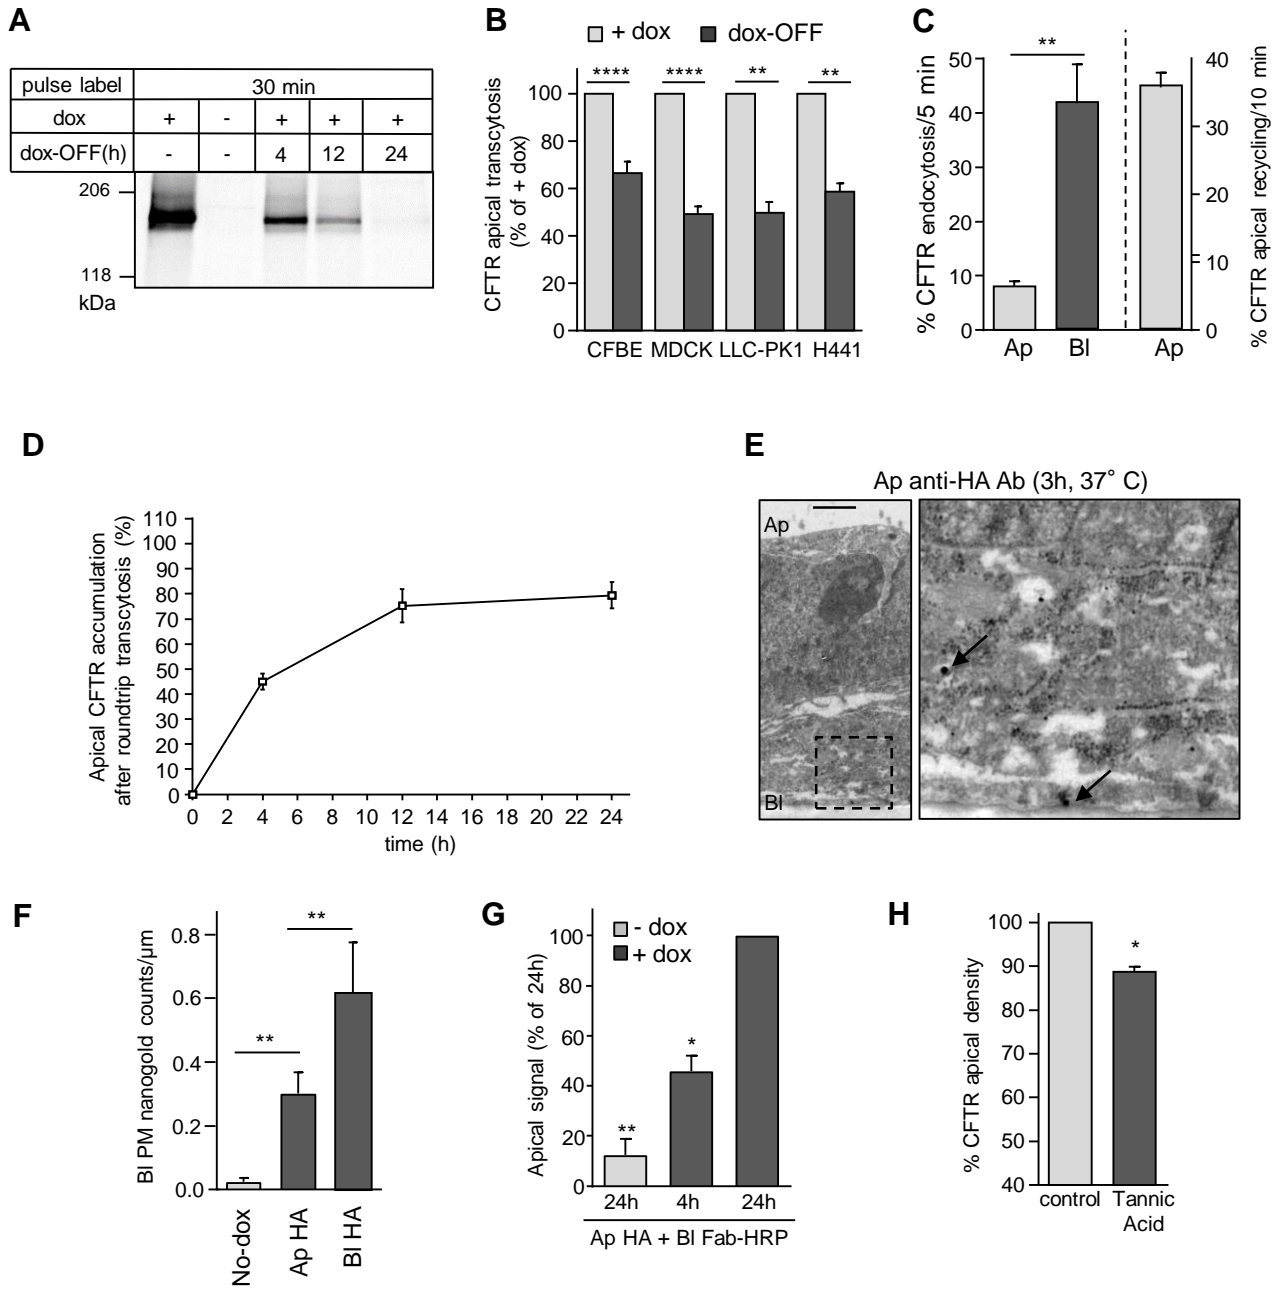

Figure 3



**Figure 3. Apical transcytosis retrieves basolaterally missorted CFTR from the biosynthetic and apical recycling pathways.**

(A) Onset of CFTR translational arrest in dox-OFF CFBE. Translational inhibition was measured by metabolic pulse labeling with  $^{35}\text{S}$ -methionine/ $^{35}\text{S}$ -cysteine (30min) after 0-24h of dox-OFF by fluorography.

(B) CFTR apical transcytosis after 24h dox-OFF in the indicated epithelia (n=3-17).

(C) CFTR endocytosis and recycling in CFBE monitored by PM ELISA (n=7-29, two-tailed unpaired t-test).

(D) Apical CFTR labeling by basolateral-to-apical transcytosis. CFTR was labeled by continuous basolateral anti-HA capture at 37°C. Apical CFTR-Anti-HA Ab complexes were measured by PM-ELISA (n=4-5).

(E-F) CFTR basolateral transcytosis detection by immuno-EM in CFBE after apical capture of anti-HA Ab (3h, 37°C). Right micrograph is a higher magnification of the selected area. Scale bar: 1µm; arrows, CFTR-anti-HA-nanogold-anti-mouse complex. (F) quantification of nanogold particles at the basolateral PM after apical anti-HA Ab uptake (n=21-31 R.O.I.s/condition ROI/condition in +dox and no-dox, n=2-3 independent experiments, Mann-Whitney U-test).

(G) Round-trip CFTR transcytosis was monitored by simultaneous exposure of CFBE to anti-HA and anti-mouse Fab-HRP in the apical and basolateral compartment, respectively, for 4h or 24h. Transcytosed CFTR was quantified by PM-ELISA (n=3).

(H) Inhibition of transcytosis accelerates apical CFTR turnover. After blocking newly synthesized CFTR arrival (dox-OFF, 24h), CFBE was exposed basolaterally to 0.5% tannic acid (15min, 37°C) or mock treatment. Apical CFTR density was measured after 1h incubation at 37°C with PM-ELISA (n=3) and expressed as % of control. Ap: apical; Bl: basolateral.

Data are means  $\pm$  SEM on each panel, n.s. not significant, \*  $p < 0.05$ , \*\*  $p < 0.01$ , \*\*\*\*  $p < 0.0001$ .

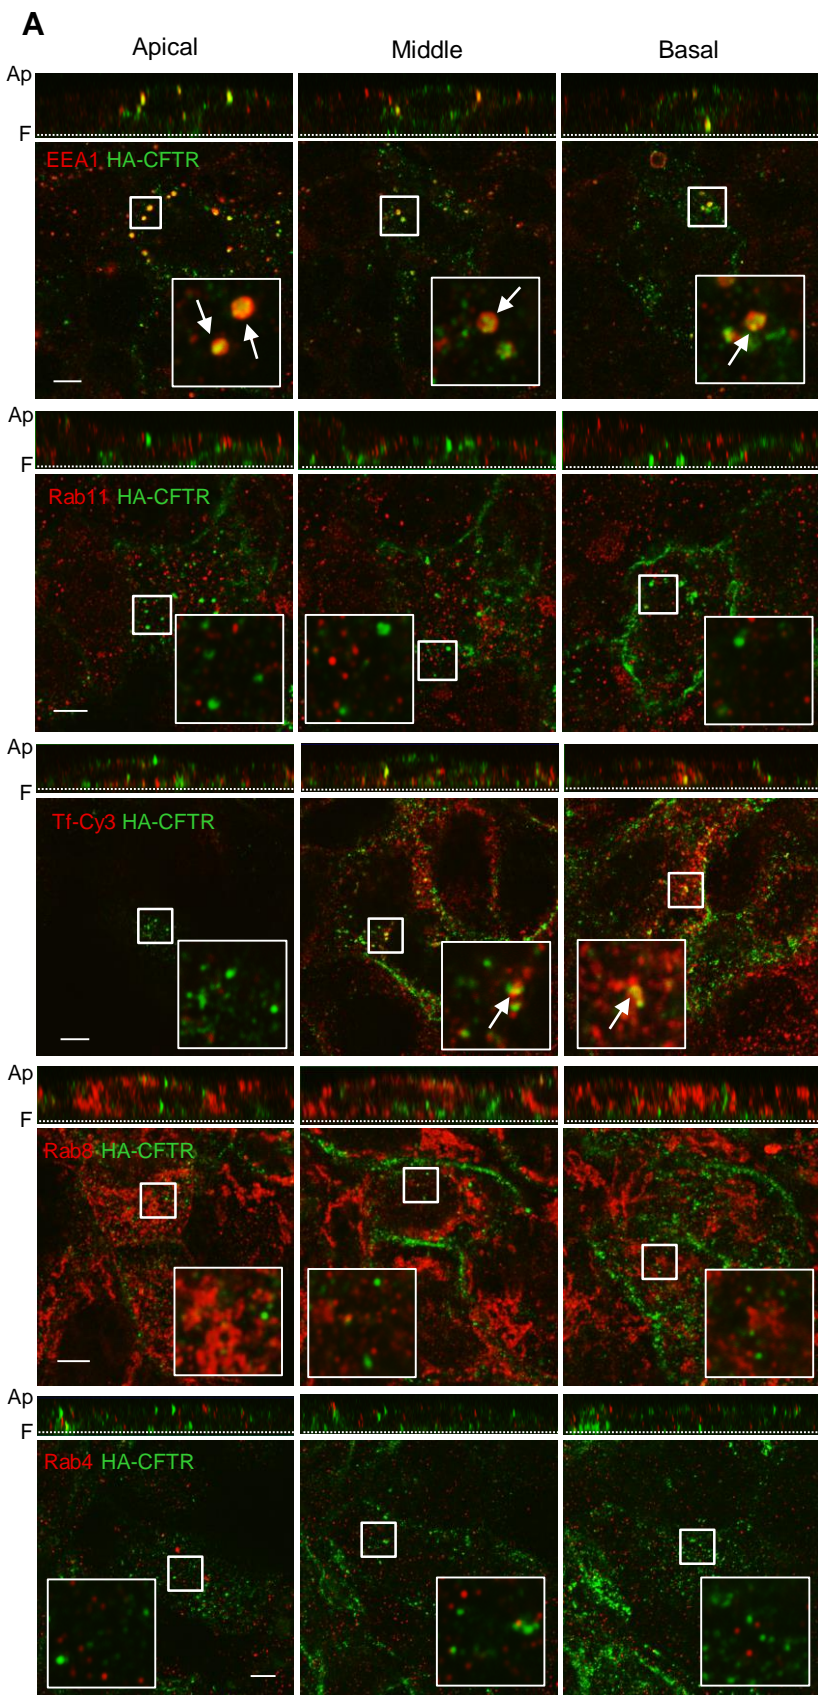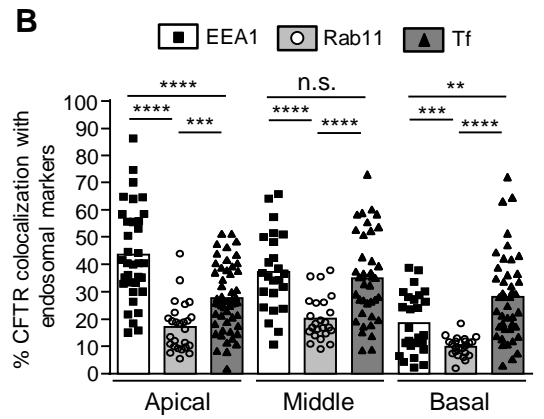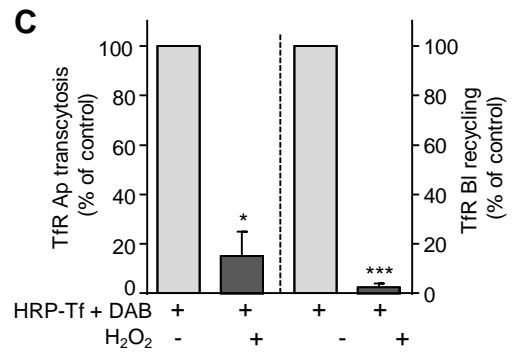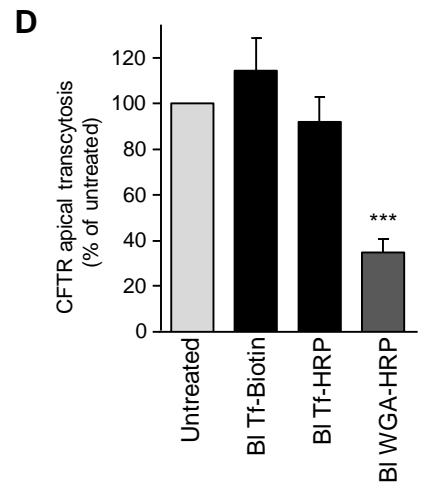

Figure 4

**Figure 4. Apical transcytotic route of CFTR in polarized CFBE.**

(A) Immunocolocalization of transcytotic CFTR. CFTR was labeled by basolateral anti-HA Ab capture (45 min, 37°C), while staining of apically delivered CFTR-anti-HA complexes were blocked with goat anti-mouse Fab. Then, transcytotic CFTR-anti-HA (green) was colocalized with EEA1, Rab11, Rab4 or Rab8 (red) by indirect immunostaining and LCFM at the apical, middle, and basal planes of CFBE (lower panels). Vertical optical sections are shown as top panels. TfR was labeled by Cy3-Tf uptake (45min). Inserts represent ~3.5-fold magnification of the selected area. Ap, apical PM; F, filter.

(B) Quantitative colocalization of transcytosed CFTR with organellar markers. Each dot represents the Mander's coefficient of 23-54 R.O.I.s at the apical, middle or basal planes of CFBE (n=3, two-tailed unpaired t-test).

(C) Functional ablation of TfR containing endosomes. Tf-HRP was basolaterally loaded (30 min, 37°C) and incubated with H<sub>2</sub>O<sub>2</sub> and DAB or DAB alone (control). Apical transcytosis or basolateral recycling of Tf-HRP was measured as described in Methods and expressed as percentage of control (n=3).

(D) CFTR apical transcytosis is largely independent of the TfR trafficking route but intersects with BSE. Following functional ablation of Tf-HRP or HRP-WGA loaded endosomes, CFTR apical transcytosis was measured for 3h at 37°C. Tf-biotin was used as control (n=4-5).

Data are means ± SEM on each panel, \* p<0.05, \*\*p<0.01, \*\*\* p<0.001, \*\*\*\* p<0.0001.

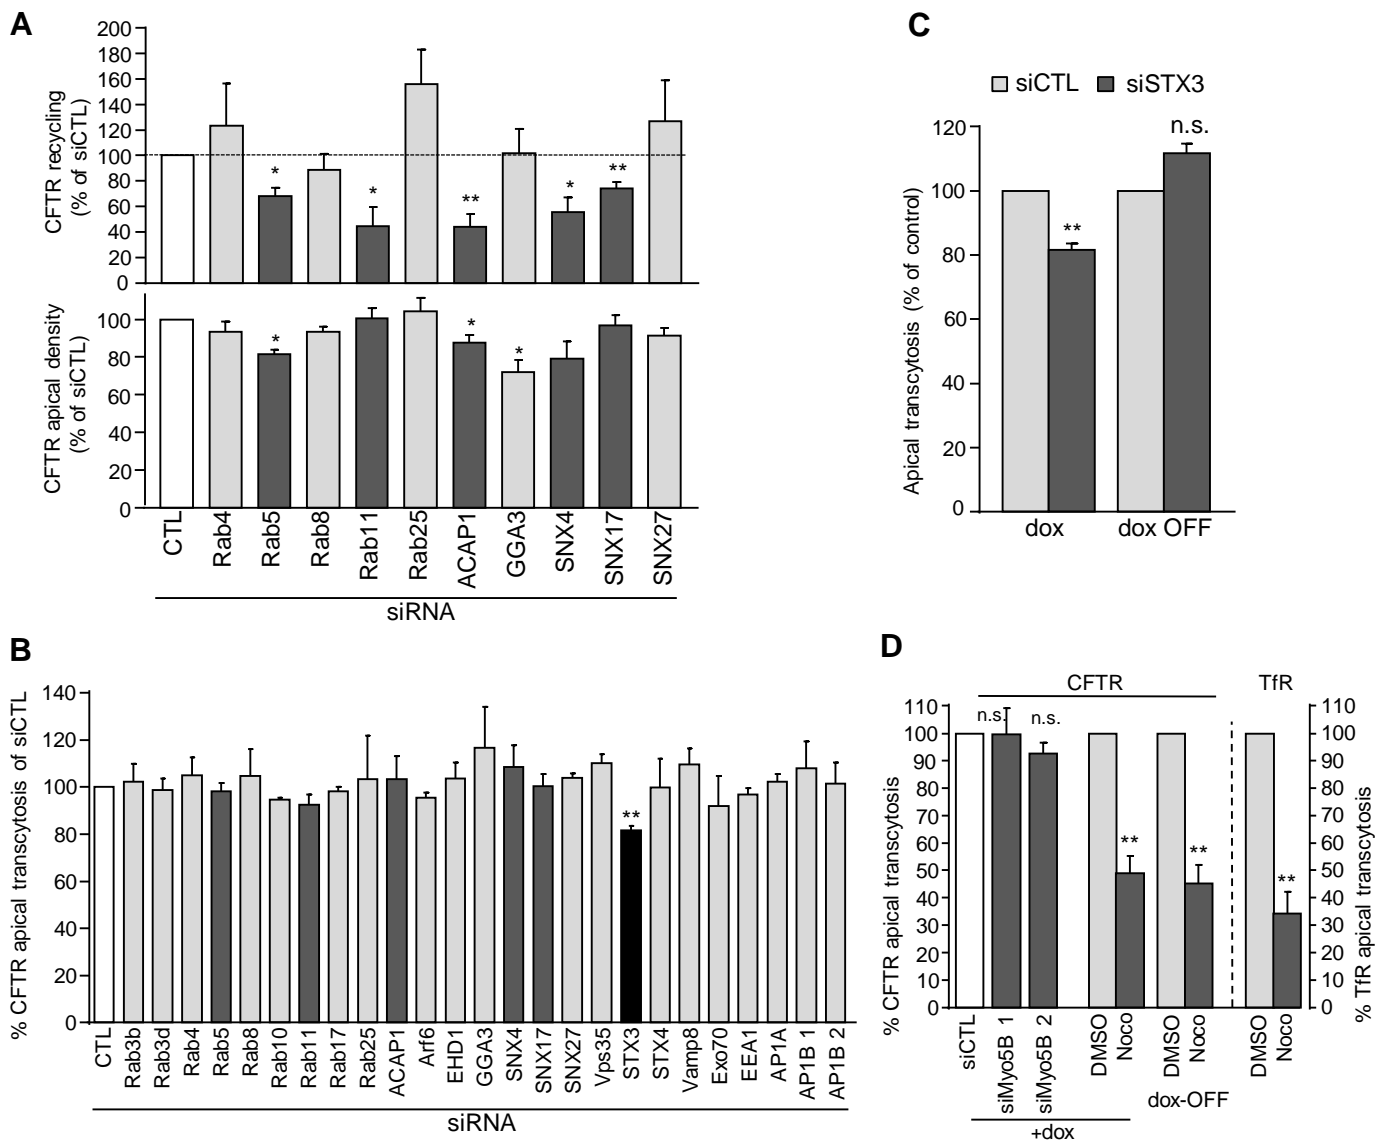

Figure 5

**Figure 5. Modulation of CFTR transcytosis.**

(A-B) CFTR recycling, apical density and transcytosis were measured in CFBE silenced for the indicated protein. Results are expressed as % of the control siRNA (CTL) (n=2-42).

(C) STX3 may contribute to the basolateral missorting of newly synthesized CFTR. CFTR apical transcytosis was measured after 24h dox-OFF in CFBE transfected with control (CTL) or STX3 siRNAs (n=3-4).

(D) CFTR apical transcytosis is microtubules-dependent. CFTR and TfR transcytosis was determined in CFBE, transfected with control (CTL) or Myo5B specific siRNAs or pretreated for 30 min and during transcytosis with 33 $\mu$ M nocodazole or DMSO (n=3-6).

Data are means  $\pm$  SEM on each panel, n.s. non-significant, \* p<0.05, \*\* p<0.01.

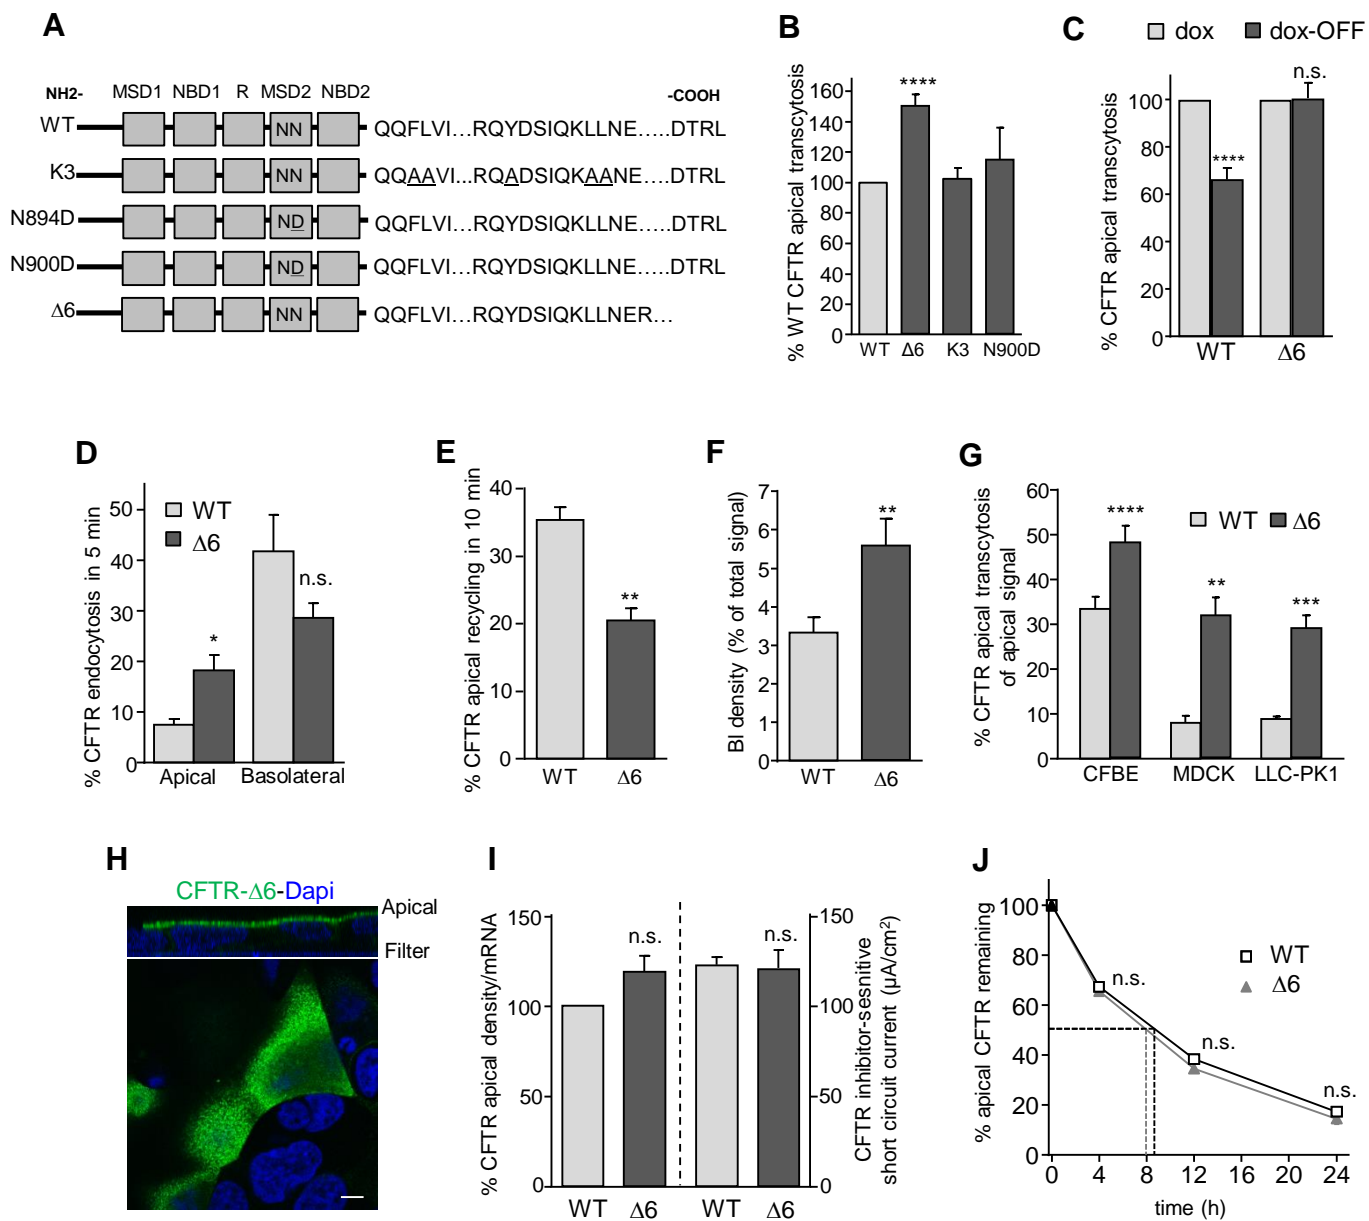

Figure 6

**Figure 6. The effect of sorting signal and PDZ-domain binding motif mutation on CFTR polarized sorting and function in epithelia.**

(A) Mutagenesis of sorting signals that may influence CFTR transcytosis. Endocytic consensus sites <sup>1424</sup>Tyr (Y) and <sup>1430-1431</sup>Leu (L) were mutated to Ala (A). NN represents <sup>895</sup>Asn and <sup>900</sup>Asn two N-linked glycosylation sites in the MSD2. DTRL: PDZ-domain binding motif at the C-terminus. MSD, membrane spanning domain; NBD, nucleotide binding domain; R, regulatory domain.

(B) Deletion of the DTRL motif ( $\Delta 6$ ) increases CFTR apical transcytosis relative to WT-CFTR (n=3-16).

(C) Biosynthetic basolateral missorting of CFTR depends on the binding of PDZ-domain protein(s). CFTR apical transcytosis was measured in control (+dox) or dox-OFF (after 24h) cells (n=17-18).

(D-E) Apical but not basolateral CFTR internalization is accelerated upon deletion of the PDZ binding motif (n=3-7, two-tailed unpaired t-test). (E)  $\Delta 6$  mutation impairs CFTR apical recycling (n=6), measured by PM-ELISA.

(F) WT- and  $\Delta 6$ -CFTR basolateral cell-surface density was measured by PM-ELISA (n=11-15, two-tailed unpaired t-test).

(G) The effect of  $\Delta 6$  mutation on CFTR apical transcytosis in the indicated cell line (n=4-15).

(H)  $\Delta 6$ -CFTR is predominantly detected at the apical PM in CFBE by indirect immunostaining, performed as in Figure 1D. Scale bar: 5 $\mu$ m.

(I) The apical PM density and channel function of WT- and  $\Delta 6$ -CFTR were measured by PM -ELISA and 10 $\mu$ M forskolin-stimulated short circuit current (Isc), respectively, and corrected for their relative mRNA level (n=3). CFTR mediated Isc was quantified after inhibition with CFTR<sub>inh</sub> 172.

(J) Apical stability of WT- and  $\Delta 6$ -CFTR is similar. CFTR was labeled with anti-HA (1h, ice) and chased for the indicated time before PM -ELISA (n=4-6, two-tailed unpaired t-test).



Data are mean  $\pm$  SEM on each panel, n.s. not significant. \*  $p < 0.05$ , \*\*  $p < 0.01$ , \*\*\* $p < 0.001$ , \*\*\*\* $p < 0.0001$ .

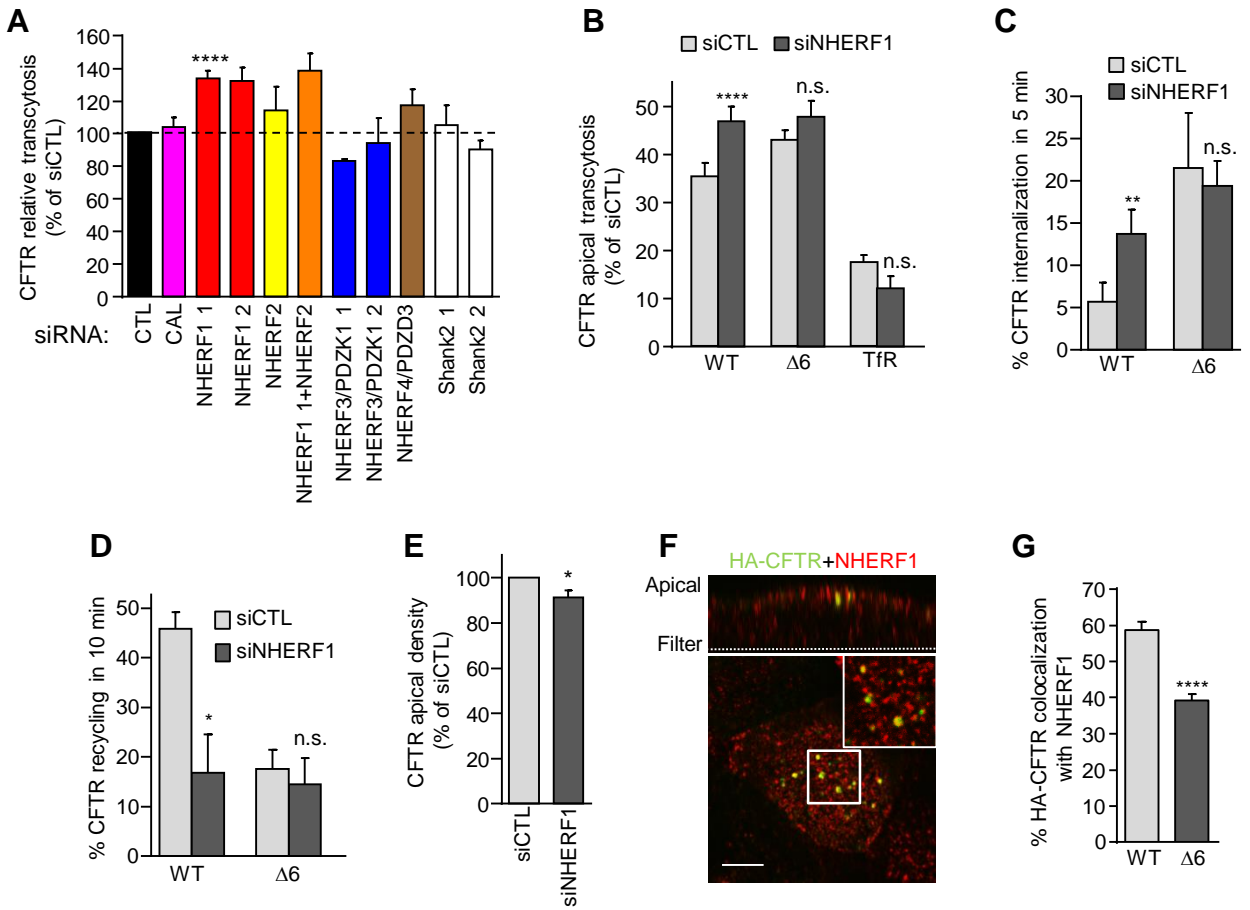

Figure 7

**Figure 7. NHERF1 ablation phenocopies the  $\Delta 6$ -CFTR cellular phenotype.**

(A) CFTR transcytosis was assayed after siRNA-mediated knockdown of the indicated PDZ proteins in CFBE and expressed as the % of siCTL treated cells (n=2-19).

(B-E) NHERF1 silencing mirrors the PDZ-binding motif truncation of CFTR. CFBE were transfected with control siCTL or NHERF1 1 siRNA and then assayed for (B) CFTR and TfR transcytosis following 3h basolateral anti-HA or Tf-HRP capture (n=3-10), (C) CFTR internalization (n=5-6), (D) CFTR recycling (n=3-4), (E) CFTR apical PM density (n=10), measured as described in Methods.

(F) NHERF1 colocalizes with the apical endocytosed CFTR. CFTR was labeled by anti-HA capture (1h, 37°C) from the apical compartment. Residual CFTR apical PM was blocked with goat anti-mouse Fab on ice. NHERF1 (red) and CFTR (green) were visualized by indirect immunostaining and LCFM in permeabilized cells. Upper panel represents a z-section. The insert is a 4-fold magnification of the R.O.I. Scale bar: 5  $\mu$ m.

(G) Quantification of colocalization between NHERF1 and subapical endocytosed WT- and  $\Delta 6$ -CFTR in CFBE cells (n=42-52 R.O.I., 2 independent experiments, two-tailed unpaired t-test).

Data are mean  $\pm$  SEM on each panel, \* p <0.05, \*\* p<0.01, \*\*\*\* p<0.0001.

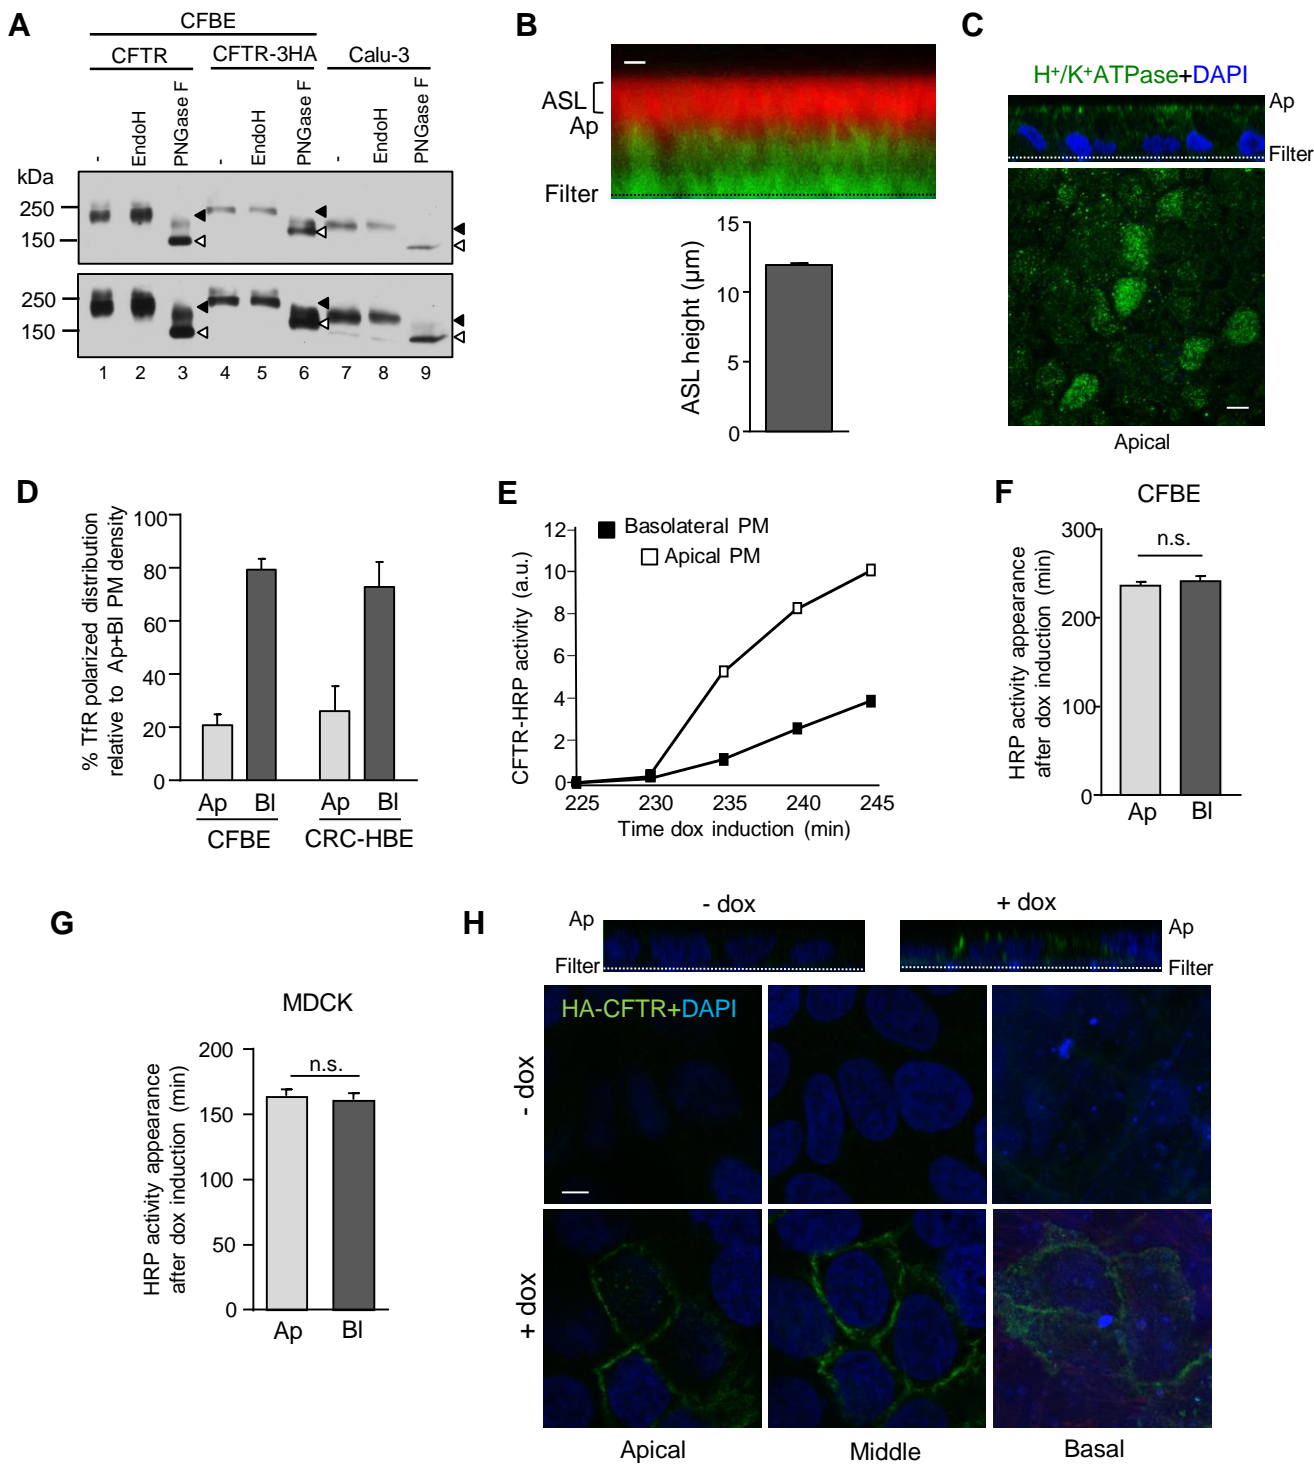

**Supplementary Figure 1. Biochemical and morphological characterization of immortalized (CFBE) and primary conditionally reprogrammed (CR-HBE) human bronchial epithelia.**

(A) Electrophoretic mobility of endogenous and exogenous CFTR before and after endoglycosidase digestion was visualized by immunoblotting. Cell lysates from endogenous or 3HA-tagged CFTR expressing polarized Calu-3 or CFBE cells were probed with anti-CFTR (L12B4 and M3A7) Abs before or after endoglycosidase H (endoH) or Peptide-N-Glycosidase F (PNGase F) digestion. Complex-glycosylated and deglycosylated forms of CFTR are indicated by filled and empty arrowheads, respectively.

(B) ALI differentiated CR-HBE and the airway surface liquid (ASL) were stained with Cell tracker (green) and rhodamin-dextran (red), respectively (upper panel). ASL height was determined in 3-10 areas on 2 filters in 2 independent experiments as described in Methods. Bar: 10 $\mu$ m.

(C) Differentiated CR-HBE cells at ALI interface were immunostained for H<sup>+</sup>/K<sup>+</sup>-ATPase (green) and the nuclei were visualized with DAPI (blue). Bar: 5 $\mu$ m.

(D) Steady-state PM expression of TfR in filter-grown CFBE and CR-HBE was measured after HRP-Tf loading for 1-3 h at 37°C from the apical or basolateral compartment. HRP activity was measured at both apical and basolateral PM. Surface density is expressed as the % of total PM expression (n=4-7).

(E-G) Newly synthesized CFTR-HRP concurrently arrives at both PM domains. CFTR-HRP activity was monitored after dox-induction at indicated times in the apical and basolateral compartments. Representative experiment in CFBE is shown in (E) and the mean delay of CFTR-HRP arrival time after dox induction is depicted in CFBE (n=8) and MDCK cells in (G) (n=5).

(H) Specificity of basolateral CFTR staining on filter grown CFBE cells. CFBE were induced (+dox) or not (-dox) in the presence of doxycycline and incubated with anti-HA Ab from the basolateral compartment for 45 min at 37°C, while the apical compartment was supplemented with goat anti-mouse Fab. Indirect immunostaining was done on permeabilized cells and labeled CFTR

bioRxiv preprint doi: <https://doi.org/10.1101/411322>; this version posted September 7, 2018. The copyright holder for this preprint (which was not certified by peer review) is the author/funder. All rights reserved. No reuse allowed without permission.

was visualized by LCFM. Upper panels are representative z-sections. CFTR (green), actin (red) and DAPI (blue). Scale bar, 5 $\mu$ m. Data are means  $\pm$  SEM on each panel. n.s. non-significant.

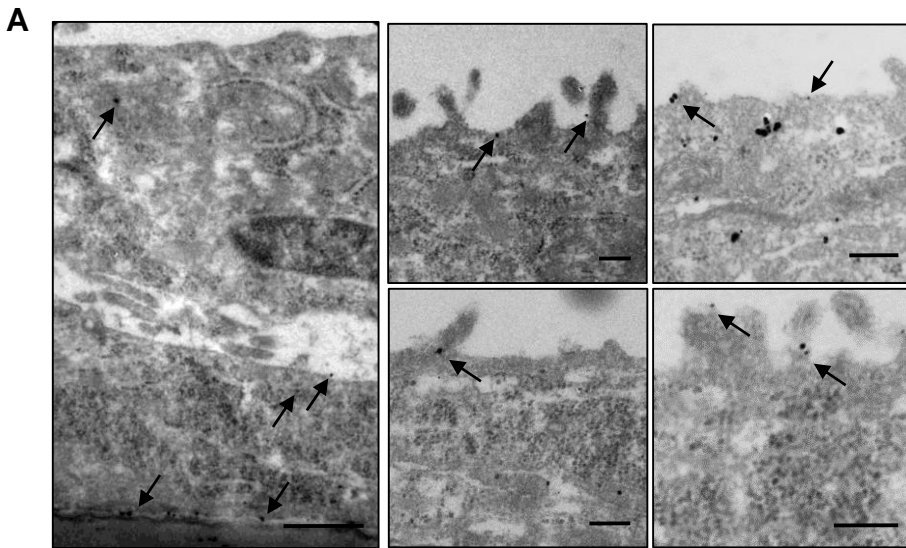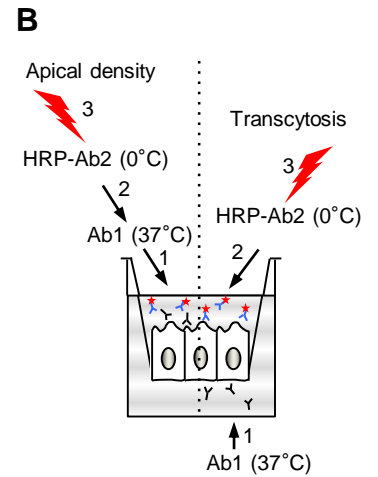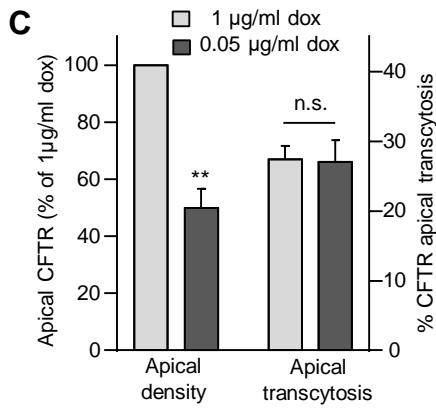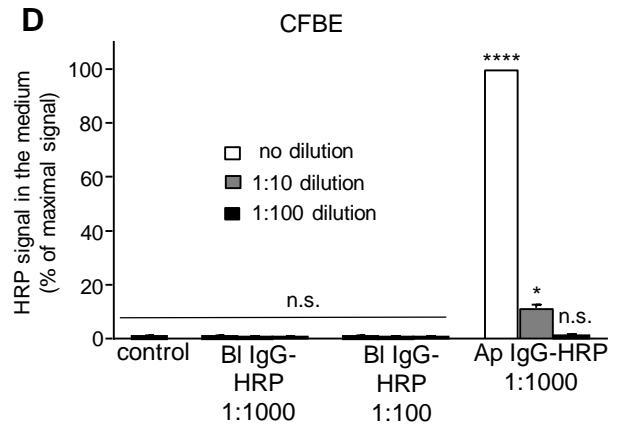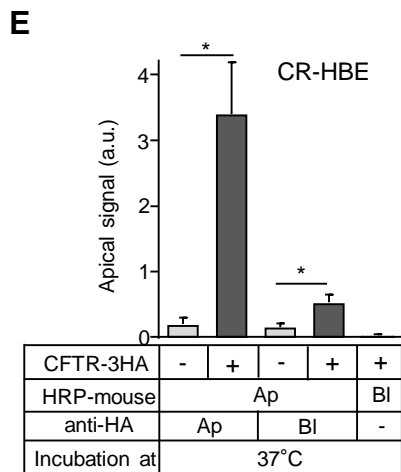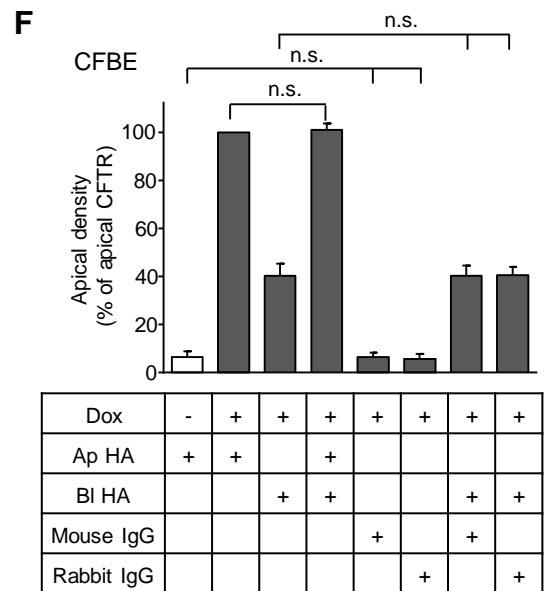

## **Supplementary Figure 2. Assay development to monitor CFTR transcytosis in polarized**

### **human airway cells.**

(A) Immuno-EM detection of CFTR-3HA after basolateral anti-HA labeling (3h, 37°C) in CFBE. CFTR-3HA-anti-HA complexes were revealed with nanogold-conjugated anti-mouse Ab (arrows). Scale bar, 0.2  $\mu$ m.

(B) Apical transcytosis assay. Basolateral PM proteins were labeled with primary Ab (Ab1) at 37°C (1, right) and the Ab apical appearance was quantified by HRP-conjugated secondary Ab binding (Ab2) in the presence of Amplex Red substrate (2-3, right). In parallel samples, the steady-state CFTR density was determined at the apical PM by PM-ELISA at 37°C (1-3, left).

(C) Relative transcytosis flux of CFTR is unaltered after 50% reduction of the apical CFTR expression. CFTR expression was induced in the presence of 0.05  $\mu$ g/ml (light grey) or 1  $\mu$ g/ml (dark grey) doxycycline. At 0.05  $\mu$ g/ml doxycycline CFTR-3HA expression was ~25% of that detected in Calu-3 cells by quantitative immunoblotting (see also Fig.1A). Apical density and relative transcytosis of CFTR were measured by PM-ELISA (n=3-4).

(D-F) Specificity of the PM-ELISA-based CFTR transcytosis assay in CFBE (D, F) and in CR-HBE (E) cells. (D) HRP-conjugated anti-mouse IgG were incubated in the apical (Ap) or basolateral (Bl) compartment of CFBE cells and HRP activity of diluted apical medium samples was measured in the presence of Amplex Red. Signal was normalized to the maximum HRP activity, obtained with apical IgG-HRP and statistical difference was calculated relative to untreated cells (n=3). HRP-anti-mouse Ab did not traverse the CFBE monolayer to the apical compartment. (E) No significant signal was detected at the apical PM after basolateral (3h, 37°C) incubation of HRP-anti-mouse Ab (n=2-4) in CR-HBE. (F) Similar HRP-anti-mouse IgG activity was measured at the Ap PM after Ap or Ap+Bl anti-HA incubation. No significant HRP signal was detectable at the apical PM after basolateral mouse or rabbit IgG alone or in the absence of CFTR expression with anti-HA incubation (n=3).



Data are means  $\pm$  SEM on each panel. n.s. non-significant, \*  $p < 0.05$ , \*\*  $p < 0.01$ , \*\*\*\*  $p < 0.0001$ .

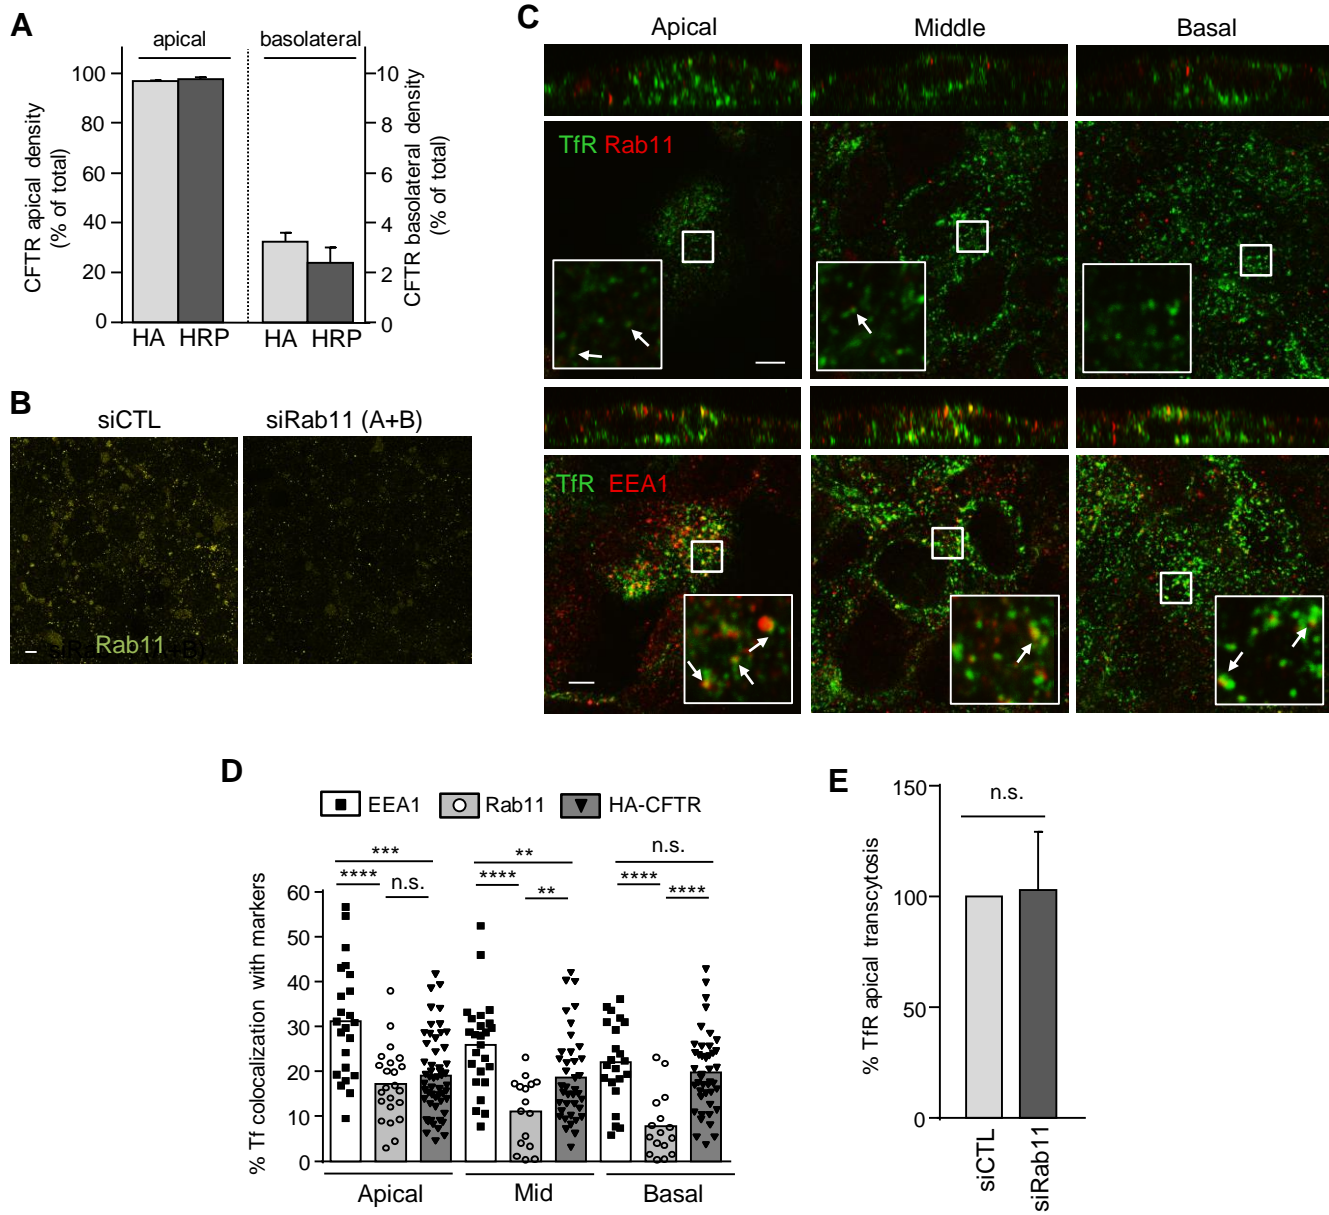

**Supplementary Figure 3. CFTR polarity and characterization of TfR transcytotic pathway in CFBE.**

(A) The steady-state apical and basolateral PM density of CFTR-3HA and CFTR-HRP was revealed by PM-ELISA and Amplex Red alone, respectively. CFTR domain-specific expression is indicated as percentage of its total PM density (n=3-12).

(B) Specificity of Rab11 immunostaining was confirmed by ablating its expression with Rab11A+B siRNAs. Scale bar: 5  $\mu$ m.

(C-D) Transcytotic TfR colocalization with CFTR, EEA1 and Rab11. (C) After endogenous Tf depletion (1h, serum-free medium), Tf-Cy3 was loaded for 45min-1h at 37°C in serum-free medium (green), then cells were fixed and co-stained for EEA1 or Rab11 (red). Inserts are selected areas at ~3.5-fold increased magnification.

(D) Quantitative colocalization of transcytotic TfR with EEA1, Rab11 and HA-CFTR was measured by the Mander's coefficient. Each dot represents the Mander's value of 16-54 R.O.I.s at the apical, middle and basal plane of CFBE, obtained from 3 independent experiments, two-tailed unpaired t-test.

(E) TfR apical transcytosis was measured after 3h of Tf-HRP uptake from the basolateral compartment in CFBE cells transfected with control (CTL) or Rab11A+B siRNAs (n=3). Scale bar: 5  $\mu$ m.

Data are means  $\pm$  SEM on each panel. n.s., non-significant, \*\*p<0.01, \*\*\*p<0.001, \*\*\*\* p<0.0001

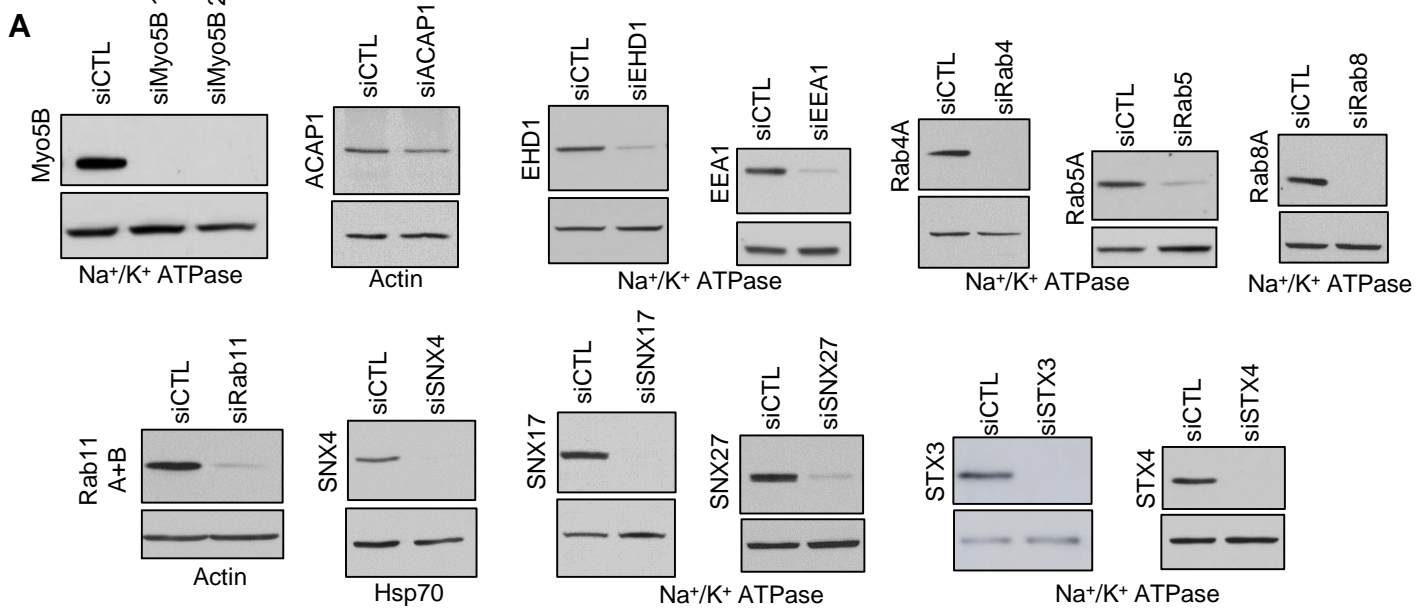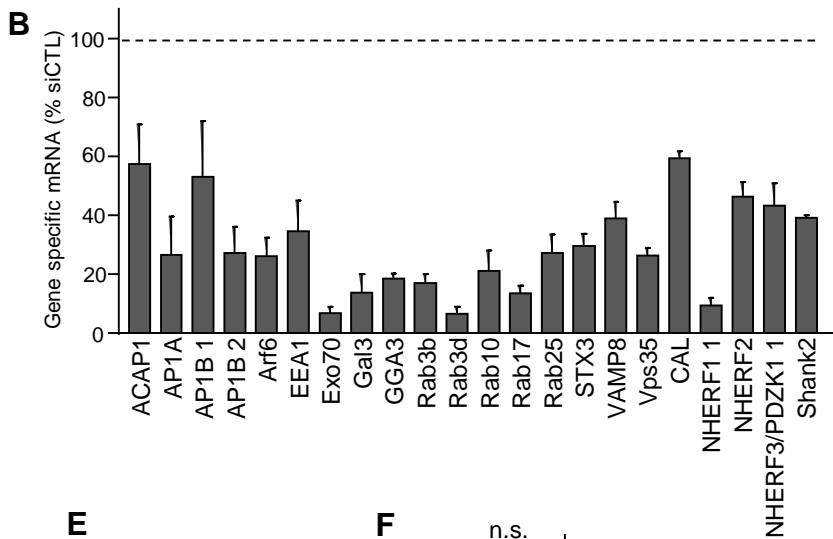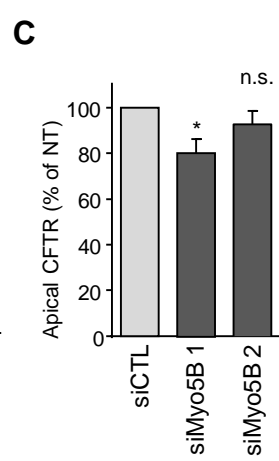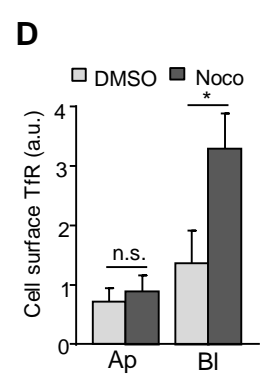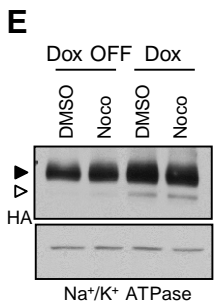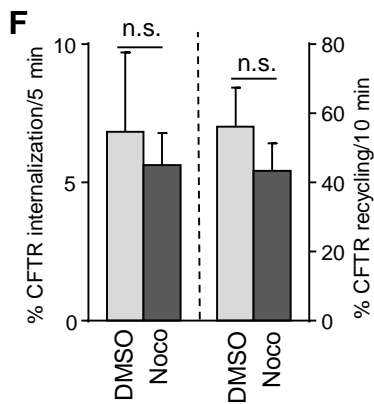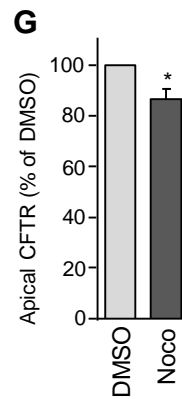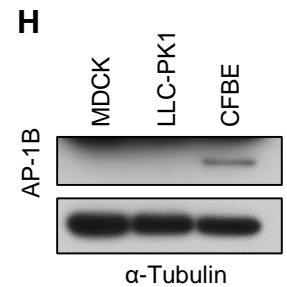

**Supplementary Figure 4. Modulators of CFTR transcytosis.**

(A-B) Validation of siRNA mediated silencing of target genes by immunoblotting (A) or qPCR (B) as described in Methods. Na<sup>+</sup>K<sup>+</sup> ATPase,  $\beta$ -actin and Hsp70 were used as loading controls for the immunoblots. The bar plot includes the means  $\pm$  SEM of parallel samples from 3-6 independent experiments and expressed as percentage of mRNA expression of siCTL transfected CFBE cells.

(C) One of the Myo5B siRNA modestly reduces CFTR apical density as compared to that of non-targeted CTL siRNA (n=4-7).

(D) The apical and basolateral PM density of TfR was assayed by PM-ELISA after DMSO (1:1000) or nocodazole (Noco, 33  $\mu$ M) treatment (3,5h). Ap: apical; Bl: basolateral (n=4).

(E) Inhibition of transcription/translation of CFTR in dox-OFF CFBE cells decreases the core- and complex-glycosylated CFTR, detected by immunoblotting. Nocodazole (33  $\mu$ M for 3.5 h) has no effect on CFTR expression relative to DMSO. Equal amounts of cell lysates were loaded. Na<sup>+</sup>K<sup>+</sup>-ATPase was the loading control.

(F) MT disruption by nocodazole (Noco, 33 $\mu$ M) does not significantly affect CFTR endocytosis and recycling (n=4). Internalization and recycling were measured by PM-ELISA as described in Methods.

(G) The apical PM density of CFTR was assayed by PM-ELISA after DMSO (1:1000) or nocodazole (Noco, 33  $\mu$ M) treatment (3,5h) (n=4).

(H) Detection of AP-1B expression by immunoblotting in the indicated cell lines. 30  $\mu$ g cell lysates were loaded and AP-1B expression was probed. Tubulin was used as loading control.

Data are means  $\pm$  SEM on each panel, n.s. non-significant, \* p<0.05.

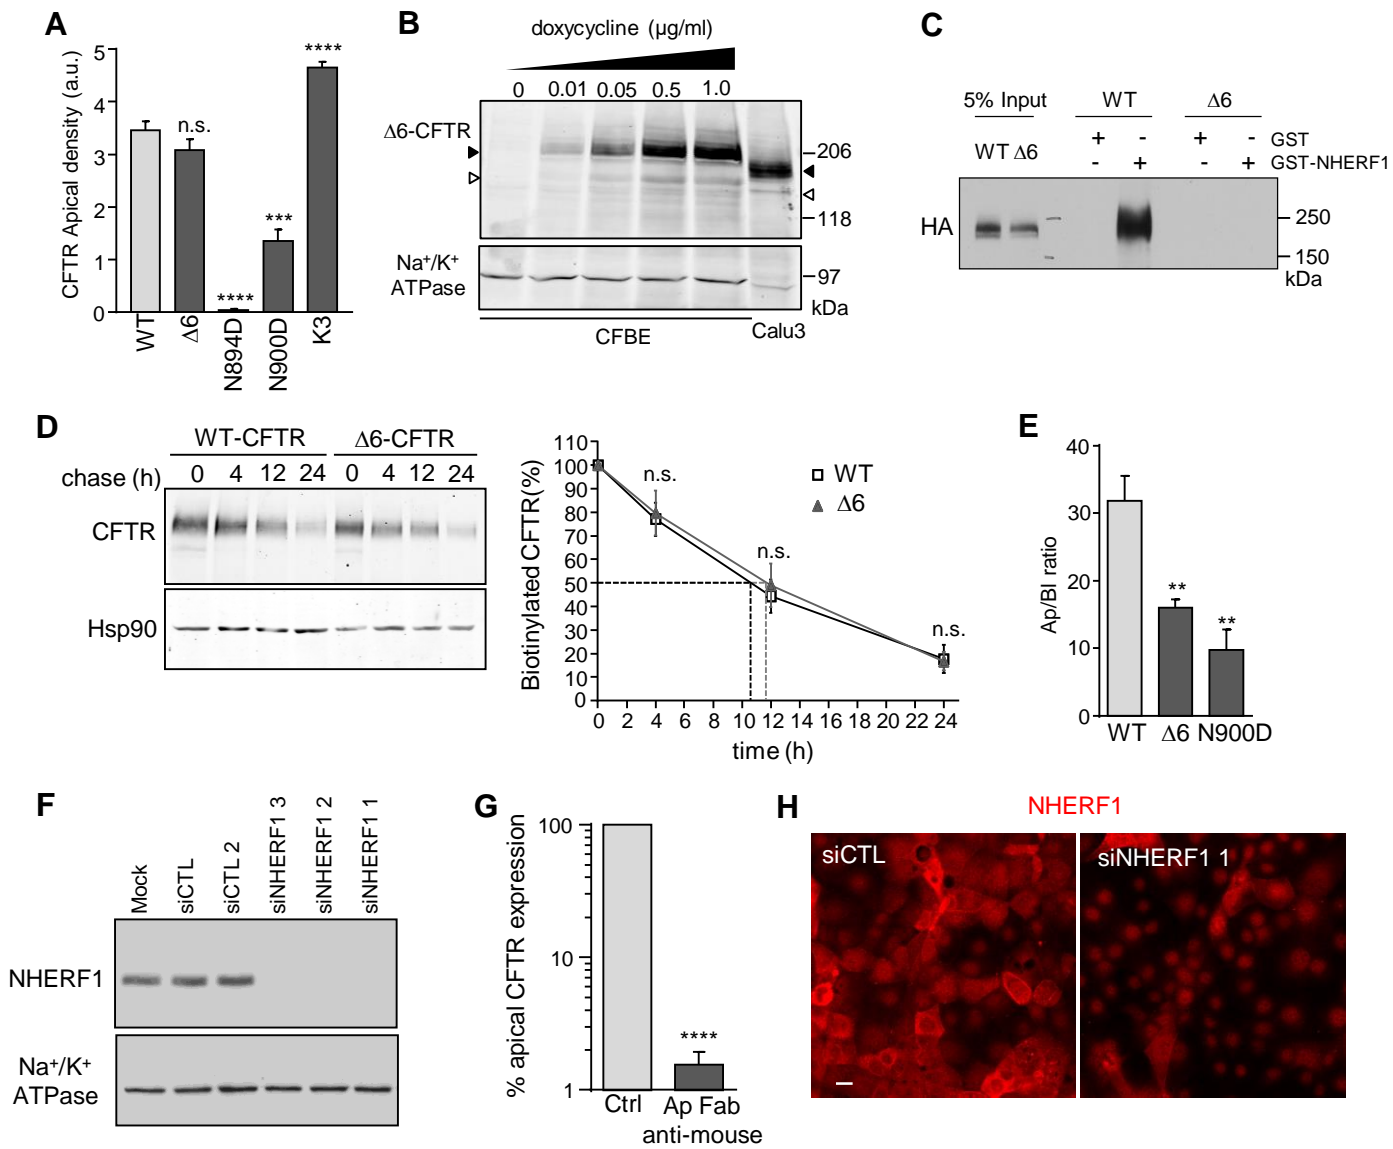

**Supplementary Figure 5. Disruption of NHERF1-CFTR interaction accelerates CFTR transcytosis.**

(A) The effect of putative apical or basolateral sorting signals on CFTR PM expression at the apical domain, measured by PM-ELISA. The abbreviations of the mutations are depicted in Figure 6A (n=3-40, two-tailed unpaired t-test).

(B)  $\Delta 6$ -CFTR was induced with doxycycline at the indicate concentration for 3 days. CFTR-3HA expression was compared to that of endogenous CFTR of Calu-3 cells in equal amounts of cell lysates by immunoblotting with anti-CFTR Abs.  $\text{Na}^+/\text{K}^+$ -ATPase was used as loading control.

(C) WT but not  $\Delta 6$ -CFTR binds to recombinant NHERF1. Solubilized WT and  $\Delta 6$ -CFTR were pulled down with recombinant GST- or GST-NHERF1, immobilized on glutathione Sepharose beads. CFTR was probed by immunoblotting together with 5% input of cell lysates with anti-HA Ab and ECL. Representative of 3 independent experiments.

(D) Cell surface stability of WT- and  $\Delta 6$ -CFTR. The PM turnover of CFTR variants was measured by biotinylation with NHS-SS-biotin at 0°C, followed by the indicated chase at 37°C. Biotinylated proteins were immunoprecipitated on monomeric avidin beads and CFTR was visualized by quantitative immunoblotting. Hsp90 was used as loading control. Right panel: quantification of CFTR remaining during the chase (n=3).

(E) WT-,  $\Delta 6$ -, and N900D-CFTR expression ratios at the Ap and Bl (Ap/Bl) PM were measured by comparing the signal obtained at both domains by PM ELISA (n=4-15, two-tailed unpaired t-test).

(F) NHERF1 siRNA silencing efficiency was monitored by immunoblotting.  $\text{Na}^+/\text{K}^+$  ATPase was used as loading control.

(G) The blocking efficiency of anti-HA Ab by goat anti-mouse Fab. After anti-HA labeling of CFTR at the apical PM, CFBE cells were incubated on ice with PBSCM (control) or PBSCM-

BSA0.5% + goat anti-mouse Fab (1:75). Remaining anti-HA Ab was probed with HRP-conjugated anti-mouse Ab on ice and the specific HRP activity was quantified in the presence of Amplex Red (n=8).

(H) Specificity of NHERF1 detection was confirmed by immunostaining NHERF1 in control (CTL) or NHERF1\_1 siRNA transfected CFBE cells. Scale bar: 20 $\mu$ m.

Data are means  $\pm$  SEM on each panel. n.s. non-significant, \* p<0.05, \*\* p<0.01, \*\*\* p<0.001,

\*\*\*\* p<0.0001.



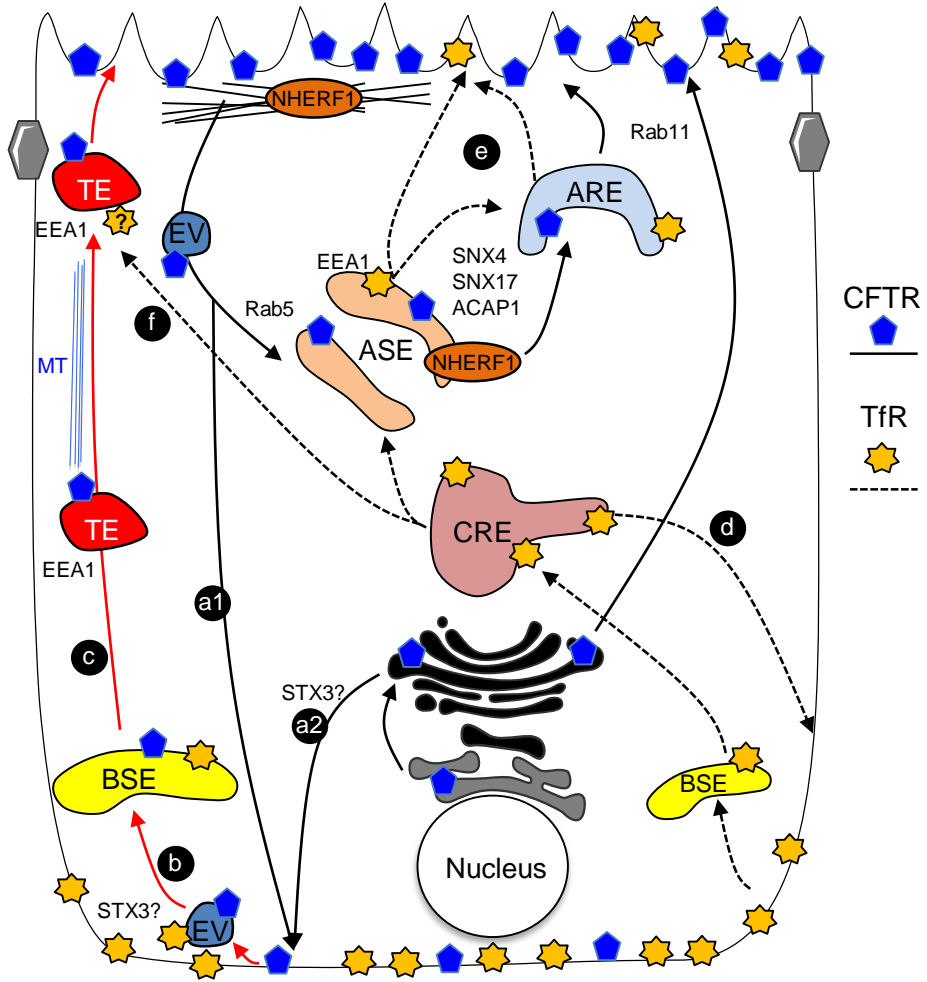

Figure S6

**Supplementary Figure 6. Working model of CFTR transcytosis in airway epithelia.**

CFTR basolateral missorting occurs from apical endosomes (a1) and at the TGN along the biosynthetic pathway (a2). (b) Missorted basolateral CFTR is retrieved from the basolateral PM into basolateral sorting endosomes (BSE). (c) CFTR is packaged into EEA1 positive transcytotic endosomes (TE) from BSE and ferried to the apical pole in a microtubules-dependent pathway. (d) The basolateral internalization, recycling and (e) transcytotic route of TfR is indicated by dashed lines for comparison (Perez Bay et al., 2013). While in AP1B-KD MDCK cells transcytotic TfR traverses the ARE, in CFBE cells the ARE may have a minor role in TfR delivery to the apical PM. CFTR and TfR may also use overlapping apical exocytic platform (f). ASE, Apical Sorting Endosome; ARE, Apical Recycling Endosome; BSE: Basolateral Sorting Endosome; CRE: Common Recycling Endosome; EV, Endocytic Vesicles; Bundled blue lines, microtubules (MT); interlaced black lines: cortical F-actin.

**Table S1. Antibodies used in this study**

| Name                                         | Host   | Reference     | Company              |
|----------------------------------------------|--------|---------------|----------------------|
| Monoclonal anti-ACAP1 (B-11)                 | mouse  | sc-376574     | SantaCruz            |
| Monoclonal anti-acetylated-tubulin (6-11B-1) | mouse  | T7451         | Sigma                |
| Monoclonal anti-beta-actin (mAbcam 8226)     | mouse  | ab8226        | AbCam                |
| Polyclonal anti-AP1M2                        | rabbit | bs-13638R     | Bioss                |
| Monoclonal anti-CFTR (L12B4)                 | mouse  | MAB3484       | Millipore            |
| Monoclonal anti-CFTR (M3A7)                  | mouse  | MAB3480       | Millipore            |
| Monoclonal anti-EBP50/NHERF1 (clone6)        | mouse  | 611160        | BD transduction labs |
| Monoclonal anti-EGFR (ICR10)                 | rat    | GTX20231      | GeneTex              |
| Monoclonal anti-H+K+ ATPase (2G11)           | mouse  | ab2866        | AbCam                |
| Monoclonal anti-HA.11 (16B12)                | mouse  | MMS-101R      | Covance              |
| Monoclonal anti-Hsp70/Hsc70/Hsp73 (1B5)      | rat    | ADI-SPA-815-I | Enzo                 |
| Monoclonal anti-Hsp90 (K41009)               | rat    | ADI-SPA-839-C | Stressgen (Enzo)     |
| Monoclonal anti-mucin5A/C (45M1)             | mouse  | MS-145-P0     | ThermoFisher         |
| Monoclonal anti-Na+K+ ATPase (H-3)           | mouse  | sc-48345      | SantaCruz            |
| Monoclonal anti-SNX27 (1C6)                  | mouse  | ab77799       | AbCam                |
| Monoclonal anti-SNX4 (B-4)                   | mouse  | sc-271147     | SantaCruz            |
| Monoclonal anti-syntaxin4 (49)               | mouse  | 610439        | BD biosciences       |
| Polyclonal anti-EBP50/NHERF1                 | rabbit | ab3452        | AbCam                |
| Polyclonal anti-EEA1                         | rabbit | PA1-063A      | ThermoFisher         |
| Monoclonal anti-EHD1                         | rabbit | EPR4954       | AbCam                |
| Polyclonal anti-myosin5B                     | rabbit | PAB23710      | AbNova               |
| Polyclonal anti-Rab11                        | rabbit | R5903         | Sigma                |
| Polyclonal anti-Rab4 (EPR3042)               | rabbit | GTX62731      | GeneTex              |
| Polyclonal anti-Rab5 (S-19)                  | rabbit | sc-309        | SantaCruz            |
| Polyclonal anti-Rab8A                        | rabbit | 55296-1-AP    | ProteinTech          |
| Polyclonal anti-SNX17                        | rabbit | 10275-1-AP    | ProteinTech          |
| Polyclonal anti-syntaxin 3 (H-33)            | rabbit | sc-135259     | SantaCruz            |
| Monoclonal anti $\alpha$ -tubulin (DM1A)     | mouse  | T9026         | Sigma                |
| Polyclonal anti-ZO-1 (mid)                   | rabbit | 40-2200       | Invitrogen           |

**Table S2. siRNAs used in this study.** Normal and bold letters indicate predesigned Qiagen/Origene siRNAs and Invitrogen stealth RNAi siRNAs, respectively.

| Gene     | Product name                                          |
|----------|-------------------------------------------------------|
| CTL      | <b>Control stealth Med GC</b>                         |
| NHERF1 1 | <b>HSS145123</b>                                      |
| NHERF1 2 | Hs_SLC9A3R1_5                                         |
| NHERF2   | <b>HSS113866 ; HSS113867</b>                          |
| PDZK1 1  | Hs_PDZK1_8                                            |
| PDZK1 2  | <b>HSS107800 ; HSS182218</b>                          |
| Shank2 1 | <b>HSS117944 ; HSS177049</b>                          |
| Shank2 2 | Hs_SHANK2_9 ; Hs_SHANK2_10                            |
| CAL      | <b>HSS126013</b>                                      |
| NHERF4   | <b>HSS188224</b>                                      |
| Rab3b    | Hs_RAB3B_3 ; Hs_RAB3B_4                               |
| Rab3d    | Hs_RAB3D_3 ; Hs_RAB3D_4                               |
| Rab4     | Hs_RAB4A_5 ; Hs_RAB4A_6                               |
| Rab5     | Hs_RAB5A_5 ; Hs_RAB5A_8                               |
| Rab8     | Hs_RAB8A_4 ; Hs_RAB8A_5                               |
| Rab10    | Hs_RAB10_3 ; Hs_RAB10_5                               |
| Rab11    | Hs_RAB11A_5 ; Hs_RAB11A_6 ; Hs_RAB11B_1 ; Hs_RAB11B_6 |
| Rab17    | Hs_RAB17_4 ; Hs_RAB17_5                               |
| EEA1     | Hs_EEA1_5 ; Hs_EEA1_7 ; Hs_EEA1_9                     |
| Rab25    | Hs_RAB25_1 ; Hs_RAB25_3                               |
| EHD1     | Hs_EHD1_3                                             |
| Vps35    | Hs_VPS35_5 ; Hs_VPS35_6 ; Hs_VPS35_8                  |
| ACAP1    | Hs_CENTB1_1 ; Hs_CENTB1_5                             |
| Arf6     | Hs_ARF6_5 ; Hs_ARF6_8                                 |
| GGA3     | Hs_GGA3_1 ; Hs_GGA3_9                                 |
| SNX4     | Hs_SNX4_2 ; Hs_SNX4_7                                 |
| SNX17    | Hs_SNX17_1 ; Hs_SNX17_2                               |
| SNX27    | Hs_SNX27_5 ; Hs_SNX27_6                               |
| STX3     | SR321926-A                                            |
| STX4     | Hs_STX4A_2 ; Hs_STX4_1                                |
| Vamp8    | <b>HSS189495</b>                                      |
| Exo70    | Hs_EXOC7_5 ; Hs_EXOC7_6                               |
| Gal3     | <u>Hs_LGALS3_7 ; Hs_LGALS3_3 ; Hs_LGALS3_8</u>        |
| AP1A     | Hs_AP1M1_1 ; Hs_AP1M1_6                               |
| AP1B 1   | Hs_AP1M2_5 ; Hs_AP1M2_6 ; Hs_AP1M2_8                  |
| AP1B 2   | Hs_AP1M2_7 ; Hs_AP1M2_9 ; Hs_AP1M2_10                 |
| Myo5B 1  | <b>HSS181415</b>                                      |
| Myo5B 2  | Hs_MYO5B_7 ; Hs_MYO5B_10                              |

**Table S3. qPCR primers used in this study**

| Gene symbol   | Direction | Sequence                |
|---------------|-----------|-------------------------|
| CFTR          | forward   | AGTGGAGGAAAGCCTTTGGAGT  |
|               | reverse   | ACAGATCTGAGCCCAACCTCA   |
| GAPDH         | forward   | CATGAGAAGTATGACAACAGCCT |
|               | reverse   | AGTCCTTCCACGATACCAAAGT  |
| ACAP1         | forward   | CTGAGATGACGGTCAAGCTG    |
|               | reverse   | AGACCAGTGCCCAGTTTCAG    |
| AP1A (AP1M1)  | forward   | GAGGTGTTCTTGGACGTCATC   |
|               | reverse   | CATGCCCGAGAGGAAGACT     |
| AP1B (AP1M2)  | forward   | GGCCAGGTCCACTTCCTATG    |
|               | reverse   | GCAACTCGTAGACGATGACAAA  |
| ARF6          | forward   | AGGAACTGGTATGTGCAGCC    |
|               | reverse   | GATTTCTCTCCTTCCAGGGG    |
| EEA1          | forward   | ACCCCGAGTAGTGAGTGGC     |
|               | reverse   | CTTGAGAGCCAACCTCTCCCA   |
| EXO70 (EXOC7) | forward   | TTCCTCTGGGGTTCCTACT     |
|               | reverse   | ACGCAGTGGATGTAGGCAT     |
| GAL3 (LGALS3) | forward   | CTGGGGAAGGGAAGAAAGAC    |
|               | reverse   | CCCGATGATTGTAAGTCAAC    |
| GGA3          | forward   | AAGGGGAAGCCTGGAGTC      |
|               | reverse   | CCTCCAGCTCCTTGTGAT      |
| RAB3B         | forward   | GTGGGCATCGACTTCAAGGT    |
|               | reverse   | CCCACGGTAATAGGCTGTTG    |
| RAB3D         | forward   | GTGGGGAACAAGTGTGACCT    |
|               | reverse   | CATTGATGTTCTCCTTGGCA    |
| RAB10         | forward   | CCTTTTTCGTTTTTCGGATG    |
|               | reverse   | GGCCTGCTGTATCCCATATC    |
| RAB17         | forward   | AGCTGGTTCTCCTGGGAAGT    |
|               | reverse   | ACCACCTTTGTGAAGAACGC    |
| RAB25         | forward   | CAAGATGGGGAATGGAAGT     |
|               | reverse   | CTGTCGTGGCTGAACTCATT    |
| STX3          | forward   | TCGGCAGACCTTCGGATTC     |
|               | reverse   | TCCTCATCGGTTGTCTTTTTGC  |
| VAMP8         | forward   | TTATGACCCAGAATGTGGAGC   |
|               | reverse   | CTTCTGCGATGTCGTCTTGA    |
| VPS35         | forward   | TTTTGGAGCTGGTGGAAATC    |
|               | reverse   | TCTGGCATTCTTTTCCCAT     |
| CAL           | forward   | AGAAGATGACCAGCCTGAGC    |
|               | reverse   | CTCTGCTTGGGTTTCTGTCA    |
| NHERF1/EBP50  | forward   | GGGGCTGGCAACGAAAATG     |
|               | reverse   | GACCGGATGAACTGGCCTG     |
| NHERF2/E3KARP | forward   | CTGGTTCCGACAAGGACACTG   |
|               | reverse   | CAGGAAGGGGCTCAGAAGTT    |
| NHERF3/PDZK1  | forward   | GTGTAGCCCAGCAGAGAAG     |
|               | reverse   | ACCAGATCCACAACCTGCAT    |
| SHANK2        | forward   | GACTAAGGACCGGGGACTTC    |
|               | reverse   | TGACCACCTTAAGGACCAGG    |

## **SUPPLEMENTAL EXPERIMENTAL PROCEDURES**

### **Antibodies and reagents**

Antibodies used in this study are listed in Supplementary Table 1. Nocodazole, MESNA (Sodium 2-mercaptoethanesulfonate), DAB (3,3'-diaminobenzidine tetrahydrochloride), Horseradish peroxidase (HRP) and tannic acid were purchased from Sigma-Aldrich. Y-27632 was from Tocris. HRP-Tf and Ultrosor-G were purchased at Jackson ImmunoResearch and Pall Corporation, respectively.

### **Cell culture and medium**

CFBE, Calu-3 and 3T3-J2 cells are generous gifts from D. Gruenert (University of California-San Francisco, USA), J.W. Hanrahan (McGill University, Canada) and B. Scholte (Erasmus MC, Rotterdam, Netherlands), respectively. LLC-PK1 and NCI-H441 were purchased from the ATCC. MDCKII was described before (Benharouga et al., 2003; Veit et al., 2012). CFBE cells were propagated in MEM medium supplemented with fetal bovine serum (FBS), L-Glutamine and HEPES (Invitrogen) on coated plastic flasks as described before (Veit et al., 2012) and were seeded and differentiated for  $\geq 3$  days on coated plastic wells or polyester permeable supports (Transwell filters, Corning). MDCK II and LLC-PK1 and NCI-H441 epithelial cells were cultured in DMEM (Invitrogen) supplemented with 10% FBS. Human lung adenocarcinoma Calu-3 cells were cultured in DMEM/F12 (Invitrogen) supplemented with 10% FBS. All cells were maintained in a 37°C incubator under 5% CO<sub>2</sub>. CFBE, MDCK, NCI-H441, and LLC-PK1 cell lines, expressing inducible WT- and  $\Delta 6$ - CFTR with a 3HA or HRP tag were generated using the ClonTech pLVX-Tight-Puro lentivirus technology, as described previously (Veit et al., 2014; Veit et al., 2012; Veit et al., 2018) and induced with 250-500ng/ml dox. MDCKII cells, stably

expressing WT- or  $\Delta 6$ - CFTR-3HA, were generated by transduction with retroviral particles (Benharouga et al., 2003).

### **CR-HBE characterization and expression of CFTR-3HA**

Primary human bronchial epithelial cells (HBE) cells were isolated in W.E. Finkbeiner's laboratory under approval from the University of California, San Francisco Committee on Human Research as well as purchased from the Cystic Fibrosis Translational Research center (CFTRc), McGill University. HBE were conditionally reprogrammed and differentiated according to a modified protocol of Liu et al. (Liu et al., 2012). Briefly, HBE cells were cultured on irradiated 3T3-J2 fibroblasts in proliferation F-Medium (Liu et al., 2012) with 10 $\mu$ M of ROCK inhibitor Y-27632. After expansion, cells were plated on collagen IV coated transwell filters and differentiated in Ultrosor-G medium (Neuberger et al., 2011) at air-liquid interface during at least 4 weeks with basolateral medium change every 2-3 days. CR-HBE cells constitutively expressing WT-CFTR-3HA were developed by transducing the cells with lentiviral particles encoding the WT-CFTR-3HA in pTZV4-CMV-IRES-puro (Open Biosystems) as described (Veit et al., 2012) during proliferation, followed by two days puromycin selection before seeding on filter supports. Air Surface Liquid (ASL) height was determined after staining the ASL with 2 mg/ml tetramethyl-rhodamine dextran (D18-19, 70,000 MW, Neutral, Invitrogen), dispersed in a low boiling point perfluorocarbon (Fluorinert FC-72, boiling point 56°C, 3M Company) and the epithelia with Cell tracker (Invitrogen). The ASL height was determined in 3-10 areas of 2 filters using a Zeiss700 upright fluorescence laser confocal microscope equipped with an environmental chamber at 37°C and 5% CO<sub>2</sub>.

### **CFTR cell surface ELISA and transcytosis assay**

CFTR apical density and apical transcytosis were measured by PM-ELISA. Cells were incubated with anti-HA (1:1000) in the apical (apical density) or basolateral (transcytosis) compartment, respectively, at 37°C for 0.5-4 h. After washing with ice-cold PBS (Gibco) supplemented with 1 mM MgCl<sub>2</sub> and 0.1 mM CaCl<sub>2</sub> (PBSCM) of the apical PM, all the cells were incubated apically with horseradish peroxidase (HRP)-conjugated anti-mouse Ab (1:1000) in PBSCM-0.5% bovine serum albumin (PBSCM-BSA) (1h, on ice). Cells were washed with PBSCM and the HRP activity in the apical compartment was determined in the presence of Amplex Red fluorogenic substrate (Invitrogen) at 544 nm excitation and 590 nm emission wavelengths, using a POLARstar OPTIMA (BMG Labtech) or a Tecan Infinite M1000 (Tecan Group) fluorescence plate reader. CFTR apical transcytosis was expressed relative to its apical density, measured in parallel ( $\% \text{ Ap transcytosis} = (\text{Ap signal}^{\text{transcytosis}} / \text{Ap signal}^{\text{ap density}}) * 100$ ). Non-specific Ab binding was determined by using either non-expressing CFBE cells or replacing the anti-HA with non-specific mouse IgG under the same experimental conditions. EGFR transcytosis was measured using the same PM ELISA assay, with anti-EGFR instead of anti-HA. To monitor TfR apical transcytosis, endogenous Tf was first depleted in serum-free medium (1h), before incubation of HRP-Tf or HRP (both 5ug/ml) in the apical or basolateral compartment. After 3h, the peroxidase activity was measured on the apical PM and in the medium. TfR transcytosis was expressed as the signal intensity in the apical compartment relative to that of TfR steady state density at the basolateral PM. Round-trip transcytosis was measured by incubating simultaneously the cells with mouse anti-HA (1:1000) in the apical chamber and with HRP-conjugated anti-mouse Fab (1:1000) (Jackson Immunoresearch) in the basolateral chamber for 4 to 24h at 37°C. Cells were then extensively washed with ice-cold PBSCM and assessed for HRP activity in the apical compartment.



### **CFTR internalization and recycling assays**

CFTR internalization rate was measured by determining the CFTR-Ab complexes disappearance from the apical PM by ELISA, as described earlier (Glozman et al., 2009). Apical CFTR was labeled with anti-HA (1:1000) for 1h on ice. After washing with ice-cold PBSCM, one plate was incubated for 5 min at 37°C (P5'), while the control plate was kept on ice (P0). The amount of CFTR remaining at the PM was determined using HRP-conjugated secondary Ab and Amplex Red in both plates. The internalization rate was expressed as the percentage of the initial amount of CFTR removed in 5 min ( $\% \text{ CFTR internalization} = (P0 - P5') * 100 / P0$ ).

CFTR recycling rate was assessed by monitoring the exocytosis of internalized CFTR-Ab complexes at the apical PM. To this end, CFTR expressing CFBE cells were seeded on 4 plates (P1-P4). After anti-HA binding to apical CFTR (1h, on ice, P1-P4), the CFTR-Ab complex was internalized for 30 min at 37°C (P2-P3-P4) while a control plate was kept in cold medium (P1). The PM remaining anti-HA was blocked with anti-mouse monovalent Fab (Jackson ImmunoResearch, 1:75, 1h, on ice, P3-P4). Recycling of endocytosed CFTR was elicited at 37°C for 10 min (P4) while a blocking efficiency plate was kept in cold medium (P3). All plates were apically incubated with HRP conjugated anti-mouse Ab (1:1000) for 1h on ice, washed and peroxidase activity was measured. The recycling efficiency in 10 min was expressed as the percentage of endocytosed pool of CFTR, taking into consideration the blocking efficiency of the anti-mouse Fab ( $\% \text{ Ap recycling} = (P4 - P3) * 100 / (P1 - P2)$ ).

### **Basolateral PM turnover inhibition by tannic acid**

The basolateral membrane turnover was inhibited by tannic acid, using a modified protocol of Polishchuk et al. (Polishchuk et al., 2004). CFBE cells were treated for 15 min with 0.5% tannic acid in serum-free medium, then washed 2 times in serum-free medium and once in full medium

followed by PM ELISA. Reversibility of the tannic acid treatment was ascertained by measurement of CFTR-anti-HA complex basolateral uptake after 8h chase (data not shown).

### **Inactivation of endosomal compartments by HRP-mediated ablation**

Tf-containing endosomes were ablated as described previously (Cresawn et al., 2007) with the following modifications. Tf-depleted CFBE cells were loaded with HRP-Tf (5  $\mu$ g/ml) for 30 min (37°C) from the basolateral chamber. Cells were then washed with ice-cold PBSCM and incubated 2x5 min with 150 mM NaCl and 20 mM citric acid, pH 5.0 to remove cell surface-bound HRP-Tf. Wheat germ agglutinin (WGA)-labeled endosomes were inactivated after 20 min internalization of WGA-HRP (10  $\mu$ g/ml, Sigma) from the basolateral compartment. WGA-HRP remaining at the cell surface was removed with 3x10 min incubation with 100 mM N-acetyl-D-glucosamine. Endosomal ablation was induced by the addition of 0.1 mg/ml DAB and 0.025% H<sub>2</sub>O<sub>2</sub> for 1h on ice in the dark. The reaction was quenched with PBSCM-1% BSA. As controls, DAB or H<sub>2</sub>O<sub>2</sub> were omitted, or Tf-biotin and WGA-Alexa 647 were used instead of Tf-HRP and WGA-HRP, respectively.

### **siRNA-mediated inhibition of gene expression**

Stealth siRNAs and siRNAs were purchased from Invitrogen, Origene and Qiagen, respectively. To limit off-target effects, the siRNAs were used at a final concentration of 25nM and phenotypic screens were carried out using pools of two to four siRNAs. For filter-based experiments, CFBE cells were electroporated using the Neon Transfection system (Invitrogen) with three 10 ms 1500V pulses using 100  $\mu$ l Neon pipette tips according to manufacturer's protocol. Cells on coated plastic were transfected with Lipofectamine RNAiMax (Invitrogen) according to the manufacturer's protocol and then were polarized for 4 days in presence of dox-induced CFTR expression.

### **Immunofluorescence microscopy and colocalization**

Differentiated filter-grown CFBE cells were fixed in 4% paraformaldehyde and permeabilized with 0.2% Triton X-100. After blocking in PBSCM-BSA 0.5%, cells were incubated with primary Ab, washed with PBSCM and incubated with Alexa Fluor-conjugated secondary Abs. Extensively washed and cut-out pieces of filters were mounted between glass slide and coverslip. For monitoring intracellular CFTR colocalization, CFTR was labeled by anti-HA capture at 37°C for the indicated time. When indicated, PM CFTR staining was blocked with anti-mouse Fab prior to fixation (1h, on ice). TfR was visualized by exposing the cells to Cy3-Tf (20 µg/ml, Jackson Immunoresearch, 45min-1h at 37°C) in the basolateral compartment after depletion of the endogenous Tf in serum-free medium (1h, 37°C). Nuclei were stained with DAPI. 20-30 horizontal optical sections were acquired using a LSM-710 or LSM-780 LFCM equipped with a Plan-Apochromat 63X/1.40 oil objective (Carl Zeiss), reconstituted using the Zen 2012 software package and representative vertical sections are shown. For colocalization study, Mander's coefficient was calculated using the JACOP plugin of ImageJ software after background subtraction and thresholding from individual optical sections at the apical, middle and basal plane.

### **Monitoring CFTR apical stability by cell surface biotinylation and immunoblotting**

Apical surface proteins of filter-grown CFBE cells were biotinylated for 15 min on ice with 1 mg/ml EZ Link sulfo-NHS-SS-biotin (Thermo Fisher Scientific) in buffer H (154 mM NaCl, 3 mM KCl, 10 mM Hepes, 1mM MgCl<sub>2</sub>, 0.1 mM CaCl<sub>2</sub>, 10 mM glucose, pH 7.8). Excess biotin reagent was quenched with 100 mM glycine in PBSCM. Cells were then shifted to 37°C for 0, 4, 12 or 24 h before being lysed in RIPA buffer (150 mM NaCl, 20 mM Tris-HCl, 1% Triton X-100, 0.1% SDS, and 0.5% sodium deoxycholate, pH 8.0) containing proteases inhibitor. Biotinylated

proteins were isolated from postnuclear lysates with streptavidin-agarose beads (Invitrogen) at 4°C with end-over-end rotation. Proteins were eluted with 5X Laemmli sample buffer and visualized by immunoblotting with anti-HA or a mixture of L12B4 and M3A7 mouse monoclonal anti-CFTR Abs followed by either IRDye 800 anti-mouse Abs (Licor Biosciences, Lincoln, NE, USA) with the Odyssey Infrared Imaging System (Licor Biosciences) or using enhanced chemiluminescence as described (Benharouga et al., 2001).

### **Electron microscopy**

Filter-grown CFBE cells were incubated with anti-HA (1:500) in the basolateral or apical compartment for 3h at 37°C. Cells were washed, fixed, permeabilized and incubated with 1.4nm nanogold-conjugated anti-mouse Fab fragment (1:50) (Nanoprobes, Yaphank, NY, USA) for 1h on ice. Cell monolayers were then post-fixed with 1% osmium tetroxide in 0.1 M phosphate buffer for 1h at 4°C. Samples were dehydrated through a series of graded ethanol baths and embedded in epon resin. Semi-thin sections of ~1µm were obtained with a diamond knife on an ultramicrotome (Ultracut E, Reichert-Jung) and stained with 1% toluidine blue. Then, 60 nm thick sections were cut and counterstained with 4% uranyl acetate and Reynold's lead citrate. Sections were observed under a Philips CM120 electron microscope equipped with a Gatan digital camera. Nanogold particles per µm of PM were calculated using the ImageJ software. Post-labeling steps and imaging were performed at the EM facility of the Department of Pharmacology, McGill University.

### **Short circuit current (I<sub>sc</sub>) measurement**

I<sub>sc</sub> of CFTR expressing CFBE was measured on cells differentiated on 12 mm Snapwell filters (Corning) mounted in Ussing chambers and bathed in Krebs-bicarbonate buffer (140 mM Na<sup>+</sup>, 120 mM Cl<sup>-</sup>, 5.2 mM K<sup>+</sup>, 25 mM HCO<sub>3</sub><sup>-</sup>, 2.4 mM HPO<sub>4</sub>, 0.4 mM H<sub>2</sub>PO<sub>4</sub>, 1.2 mM Ca<sup>2+</sup>, 1.2 mM Mg<sup>2+</sup> and 5 mM glucose, pH 7.4) at 37°C in the presence of an apical-to-basolateral chloride

gradient. To functionally isolate apical PM, the contralateral domain was permeabilized with 100  $\mu\text{M}$  amphotericin B. In each experiment, 100  $\mu\text{M}$  amiloride and 20  $\mu\text{M}$  forskolin were added sequentially to the apical and basolateral side to inhibit the epithelial  $\text{Na}^+$  channel and activate CFTR, respectively. CFTR activity was inhibited by 20  $\mu\text{M}$  of channel blocker CFTR<sub>inh</sub> 172.

### **Recombinant NHERF1 purification and pulldown**

GST or GST-NHERF1 was expressed in BL21 bacterial strain by pGEX-4T plasmid. Bacterial pellets were resuspended in 50 mM Tris-Cl pH 8, 50 mM NaCl, 5 mM EDTA, 0.5% NP-40, 5% glycerol (50  $\mu\text{l/ml}$ ) and sonicated. The lysate was centrifuged at 14000x rpm (30 min, 4°C) and passed through a Dowex 50X2-400 ion-exchange resin (Acros Organics). The flow through was incubated with glutathione-sepharose 4B beads (GE Healthcare) for 2 h at 4°C. After 3 washes, beads were incubated with the post-nuclear supernatant of the CFBE cell lysate, expressing WT- or  $\Delta 6$ -CFTR for 2h at 4°C under rotation. After 3 washes with RIPA, co-isolated CFTR was immunoblotted.

### **Metabolic pulse labeling**

Post-confluent filter-grown CFBE cells were incubated with methionine- and cysteine-free alpha-MEM medium for 45 min at 37°C. Cells were then pulse labeled in the presence of [<sup>35</sup>S]-methionine and [<sup>35</sup>S]-cysteine (0.1 mCi/ml; Perkin Elmer, Waltham, MA, USA) from the basolateral compartment for 30 min at 37°C in a humid chamber. After washing with ice-cold PBSCM, CFTR was immunoprecipitated with a mixture of M3A7 and L12B4 anti-CFTR Abs. Following autoradiography, radioactivity incorporated into CFTR was quantified by phosphorimage analysis, using a Typhoon workstation (GE Healthcare).

### **EndoH and PNGase F digestion of CFTR**

CFBE and Calu-3 cells expressing CFTR-3HA and endogenous CFTR were grown on 6 cm coated plastic dishes for 4-5 days post confluency. CFTR expression in CFBE was induced with 250 ng/mL dox for 4 days. Cells were lysed (0.3 % Triton X100, 150 mM NaCl, 20mM Tris pH 8.0) and after centrifugation (at 4°C, 12000rpm for 10 min), the supernatants were digested with EndoH or PNGase F enzyme according to the manufacturer's protocol. Samples were immunoblotted with anti-CFTR antibodies (L12B4, M3A7).

### **RT-qPCR**

For WT- and  $\Delta 6$ -CFTR mRNA expression, total RNA was extracted from CFBE lysed in Qiazol and analyzed using the one-step QuantiFast SYBR Green RT-PCR Kit (Qiagen, 204154) as recommended by the manufacturer. Briefly, total RNA was extracted from polarized CFBE grown on coated plastic in 24 well plates using the miRNeasy Mini Kit (Qiagen, 217004). Reverse transcription and PCR amplification was done sequentially in a Stratagene Mx3005P real-time thermocycler (Agilent, 401513) during the same thermocycler protocol on 50-100ng total RNA, determined by Nanodrop UV-Vis light absorbance. The abundance of transcripts was determined using a SYBR Green fluorescence amplification curve and its intersection with a preset threshold, yielding a Ct value. Data were analyzed by efficiency-corrected comparative quantification with MxPro QPCR software (Agilent) and the variations in initial RNA loading amount was normalized with GAPDH as a reference gene. mRNA expression differences between samples were reported as percent abundance relative to a reference sample (e.g. WT-CFTR). PDZ proteins down-regulation was evaluated with Quanti-Tect reverse transcription kit (Qiagen) as previously described (Veit et al., 2012).

### **Statistical analysis**

Results are presented as mean  $\pm$  SEM of the number of independent experiments indicated in the figure legends, as biological replicates. Unless specified, P values were calculated with the means of at least 3 independent experiments by two-tailed paired student's t-test and a 95% confidence level was considered significant. Normal distribution of data and homogeneity of variance were validated by calculating the skew factor ( $-2 > \text{skew} < 2$ ) and performing the F-test, respectively. For non-normal data, Mann-Whitney U-test was used for calculating the P-values and was indicated in the figure legend. For normal distributions with non-homogenous variances, the Welch correction was applied to two-tailed unpaired t-test to calculate the P-values and was indicated in the figure legend. All ELISA-based assays were performed using 2-4 technical replicates, except CFTR-HRP polarized delivery (1-2 technical replicates). Short circuit current measurement and qPCR were performed with 2 technical replicates.

## SUPPLEMENTAL REFERENCES

- Benharouga, M., Haardt, M., Kartner, N., and Lukacs, G.L. (2001). COOH-terminal Truncations Promote Proteasome-dependent Degradation of Mature Cystic Fibrosis Transmembrane Conductance Regulator from Post-Golgi Compartments. *J Cell Biol* 153, 957-970.
- Benharouga, M., Sharma, M., So, J., Haardt, M., Drzymala, L., Popov, M., Schwapach, B., Grinstein, S., Du, K., and Lukacs, G.L. (2003). The role of the C terminus and Na<sup>+</sup>/H<sup>+</sup> exchanger regulatory factor in the functional expression of cystic fibrosis transmembrane conductance regulator in nonpolarized cells and epithelia. *The Journal of biological chemistry* 278, 22079-22089.
- Cresawn, K.O., Potter, B.A., Oztan, A., Guerriero, C.J., Ihrke, G., Goldenring, J.R., Apodaca, G., and Weisz, O.A. (2007). Differential involvement of endocytic compartments in the biosynthetic traffic of apical proteins. *The EMBO journal* 26, 3737-3748.
- Glozman, R., Okiyoneda, T., Mulvihill, C.M., Rini, J.M., Barriere, H., and Lukacs, G.L. (2009). N-glycans are direct determinants of CFTR folding and stability in secretory and endocytic membrane traffic. *The Journal of cell biology* 184, 847-862.
- Liu, X., Ory, V., Chapman, S., Yuan, H., Albanese, C., Kallakury, B., Timofeeva, O.A., Nealon, C., Dakic, A., Simic, V., *et al.* (2012). ROCK inhibitor and feeder cells induce the conditional reprogramming of epithelial cells. *The American journal of pathology* 180, 599-607.
- Neuberger, T., Burton, B., Clark, H., and Van Goor, F. (2011). Use of primary cultures of human bronchial epithelial cells isolated from cystic fibrosis patients for the pre-clinical testing of CFTR modulators. *Methods in molecular biology* 741, 39-54.
- Perez Bay, A.E., Schreiner, R., Mazzoni, F., Carvajal-Gonzalez, J.M., Gravotta, D., Perret, E., Lehmann Mantaras, G., Zhu, Y.S., and Rodriguez-Boulan, E.J. (2013). The kinesin KIF16B mediates apical transcytosis of transferrin receptor in AP-1B-deficient epithelia. *The EMBO journal* 32, 2125-2139.
- Polishchuk, R., Di Pentima, A., and Lippincott-Schwartz, J. (2004). Delivery of raft-associated, GPI-anchored proteins to the apical surface of polarized MDCK cells by a transcytotic pathway. *Nat Cell Biol* 6, 297-307.

bioRxiv preprint doi: <https://doi.org/10.1101/411322>; this version posted September 7, 2018. The copyright holder for this preprint (which was not certified by peer review) is the author/funder. All rights reserved. No reuse allowed without permission.

Veit, G., Avramescu, R.G., Perdomo, D., Phuan, P.W., Bagdany, M., Apaja, P.M., Borot, F., Szollosi, D., Wu, Y.S., Finkbeiner, W.E., *et al.* (2014). Some gating potentiators, including VX-770, diminish DeltaF508-CFTR functional expression. *Sci Transl Med* 6, 246ra297.

Veit, G., Bossard, F., Goepp, J., Verkman, A.S., Galiotta, L.J., Hanrahan, J.W., and Lukacs, G.L. (2012). Proinflammatory cytokine secretion is suppressed by TMEM16A or CFTR channel activity in human cystic fibrosis bronchial epithelia. *Molecular biology of the cell* 23, 4188-4202.

Veit, G., Xu, H., Dreano, E., Avramescu, R.G., Bagdany, M., Beitel, L.K., Roldan, A., Hancock, M.A., Lay, C., Li, W., *et al.* (2018). Structure-guided allosteric corrector combination for  $\Delta$ F508 and rare cystic fibrosis folding mutants. *Nature medicine* *in press*.
